1 Title: mTORC1 and mTORC2 regulate distinct aspects of glutamatergic synaptic transmission.

2

3

4 Abbreviated Title: mTORC1 and mTORC2 regulation of synaptic transmission.

5

6 Matthew P. McCabe<sup>1</sup>, Erin R. Cullen<sup>1</sup>, Caitlynn M. Barrows<sup>1</sup>, Amy N. Shore<sup>1</sup>, Katharine I. Tooke<sup>1</sup>, and

7 Matthew C. Weston<sup>1</sup>

8

9 1. University of Vermont, Department of Neurological Sciences, Burlington, VT 05405.

10

11 Corresponding Author:

12 Matthew C. Weston

13 Department of Neurological Sciences

14 University of Vermont

15 95 Carrigan Dr.

16 Burlington, VT 05405

17 Email: [mcweston@uvm.edu](mailto:mcweston@uvm.edu)

18

19 Conflict of Interest: The authors declare no competing financial interests.

20

21 Acknowledgements: This work was supported by NIH/NINDS grants NS087095 and NS110945, and the

22 COBRE Neuroscience award P30 103498. We thank Todd Clason, and the Molecular and Imaging Cores,

23 at the University of Vermont. Thanks to John Clements for providing the deconvolution algorithm used

24 to estimate the rate of synaptic vesicle release.

25 **Abstract**

26           Although mTOR signaling is known as a broad regulator of cell growth and proliferation, in  
27 neurons it regulates synaptic transmission, which is thought to be a major mechanism through which  
28 altered mTOR signaling leads to neurological disease. Although previous studies have delineated  
29 postsynaptic roles for mTOR, whether it regulates presynaptic function is largely unknown. Moreover,  
30 the mTOR kinase operates in two complexes, mTORC1 and mTORC2, suggesting that mTOR's role in  
31 synaptic transmission may be complex-specific. To better understand each complex's role in synaptic  
32 transmission, we genetically inactivated mTORC1 or mTORC2 in cultured mouse glutamatergic  
33 hippocampal neurons. Inactivation of either complex reduced neuron growth and evoked EPSCs,  
34 however, mTORC1 exerted its effects on eEPSCs at the postsynapse and mTORC2 at the presynapse.  
35 Furthermore, inactivation of each complex altered specific modes of synaptic vesicle release, suggesting  
36 that mTORC1 and mTORC2 differentially modulate postsynaptic responsiveness and presynaptic release  
37 to optimize glutamatergic synaptic transmission.

38

39

40

41

42

43

44

45

## 46 **Introduction**

47           The mechanistic target of rapamycin (mTOR) signaling network is an evolutionarily conserved  
48 group of interacting proteins centered around the ubiquitously expressed serine/threonine kinase  
49 mTOR. In a variety of species and cell types, mTOR signaling regulates fundamental cell biological  
50 processes such as cell growth, survival, and division (Saxton & Sabatini, 2017). In the nervous system,  
51 however, mTOR signaling plays a more specific role in neuronal communication by tuning the strength  
52 of synaptic connections (Henry et al., 2012; Huang et al., 2013; Niere et al., 2016; Sperow et al., 2012;  
53 Weston, Chen, & Swann, 2014). This regulation of synaptic strength by mTOR is thought to be necessary  
54 for learning and memory, setting E-I balance, and maintaining synaptic homeostasis. Furthermore,  
55 variants in several genes in the mTOR signaling network cause neurological diseases including epilepsy  
56 and autism (Crino, 2011; Lipton & Sahin, 2014), and increasing evidence suggests that dysregulation of  
57 synaptic transmission is a key feature of these diseases (Zoghbi & Bear, 2012).

58           A broad distinction in the organization of the mTOR signaling network is that the mTOR kinase  
59 operates in two multiprotein complexes, mTORC1 and mTORC2 (Hay & Sonenberg, 2004). Both the  
60 substrates of mTOR and the downstream cellular processes it affects are different depending on its  
61 association with mTORC1 or mTORC2 (Wullschleger, Loewith, & Hall, 2006). Biochemically, mTORC1 and  
62 mTORC2 are distinguished by their protein composition. Although they both contain mTOR and other  
63 components such as Deptor and mLST8, Raptor is a protein that is unique to mTORC1 and is essential to  
64 its function, whereas Rictor is unique to mTORC2 and essential to its function. Pharmacologically, the  
65 mTOR inhibitor rapamycin and its derivatives are more effective at inhibiting mTORC1 than mTORC2  
66 (Kang et al., 2013), but this distinction is lessened with longer exposure and at higher concentrations  
67 (Sarbasov et al., 2006).

68           Previous studies have demonstrated changes in postsynaptic function by manipulating mTOR  
69 signaling either pharmacologically or genetically. Because of the link between mTOR, protein synthesis,

70 and long-term synaptic plasticity, several studies have shown the necessity for intact mTORC1 and  
71 mTORC2 function in long-term potentiation and long-term depression (Huang et al., 2013; Stoica et al.,  
72 2011; S. J. Tang et al., 2002). At the molecular level, mTOR signaling and its downstream targets are  
73 known to regulate AMPA receptor expression and synapse number (Ran et al., 2013; Wang, Barbaro, &  
74 Baraban, 2006). More recently, postsynaptic loss of mTORC1 was shown to reduce evoked excitatory  
75 postsynaptic current (eEPSC) amplitudes onto Purkinje neurons, but mTORC2 loss did not, suggesting  
76 specific roles for the two complexes in the regulation of synaptic transmission (Angliker, Burri, Zaichuk,  
77 Fritschy, & Ruegg, 2015).

78         Despite progress in delineating the regulation of postsynaptic function by mTOR, the role of  
79 mTOR in presynaptic function, and more specifically synaptic vesicle (SV) release, is largely unexplored.  
80 Studies at the *Drosophila* neuromuscular junction and in rat hippocampal neurons have shown that  
81 postsynaptic mTORC1 activity provides a retrograde signal that enhances the readily releasable pool  
82 (RRP) of SVs in response to a reduction in postsynaptic glutamate receptor activity (Henry et al., 2012;  
83 Henry et al., 2018; Penney et al., 2012), and another study found that a high dose of rapamycin (3  $\mu$ m)  
84 depleted dopaminergic SVs from presynaptic terminals in the striatum (Hernandez et al., 2012), but  
85 none of these studies examined SV release itself. Interestingly, several recent studies have uncovered  
86 roles for IGF-1 receptor signaling, protein synthesis, and cholesterol biosynthesis in regulating the  
87 balance of spontaneous and evoked SV release (Gazit et al., 2016; Scarnati, Kataria, Biswas, & Paradiso,  
88 2018; Wasser, Ertunc, Liu, & Kavalali, 2007). Because these processes are up- and downstream of mTOR,  
89 this raises the possibility that mTOR may act as a hub to regulate different modes of SV fusion.

90         To assess the pre- and postsynaptic function of each mTOR complex in glutamatergic synaptic  
91 transmission, we inactivated mTORC1 signaling by conditionally deleting *Raptor*, or mTORC2 signaling by  
92 conditionally deleting *Rictor*, postmitotically in primary neuron cultures from mouse hippocampus. We  
93 then performed morphological and whole-cell patch-clamp analysis of synaptic and membrane

94 properties of glutamatergic neurons. Our results showed that both mTOR complexes are necessary to  
95 support normal neuron growth and evoked excitatory synaptic transmission, although the effects of  
96 mTORC1 on eEPSCs are postsynaptic and mTORC2 presynaptic. We further showed that each mTOR  
97 complex affects distinct modes of SV release: mTORC1 inactivation enhances modes with low rates of SV  
98 fusion, such as spontaneous release, and mTORC2 inactivation impairs modes with high rates of SV  
99 fusion, such as action potential-evoked release. Thus, mTORC1 and mTORC2 operate at distinct synaptic  
100 locations and in distinct processes, and via differential activation of these two complexes, the mTOR  
101 pathway is ideally poised to respond to external cues and make fine adjustments to glutamatergic  
102 synaptic transmission to maintain normal neural network function.

103

## 104 **Results**

### 105 **Inactivation of mTORC1 or mTORC2 in neurons, via *Raptor* or *Rictor* deletion, causes distinct effects on** 106 **downstream mTOR signaling.**

107 To investigate the effects of mTORC1 or mTORC2 inactivation on neurons, we cultured primary  
108 hippocampal neurons isolated from P0-P1 *Raptor*<sup>flox/flox</sup> or *Rictor*<sup>flox/flox</sup> mice on astrocytes isolated from  
109 P0-P1 wild-type mice. At the time of plating, we transduced the neurons with adeno-associated viruses  
110 (AAVs) expressing either an mCherry-Cre fusion protein or mCherry alone, both driven by the hSyn  
111 promoter, to generate knockout (Raptor-KO or Rictor-KO) or control (Raptor-Con or Rictor-Con)  
112 neurons, respectively. To assess the efficiency of gene deletion in Raptor-KO and Rictor-KO neurons, we  
113 performed quantitative immunofluorescence analysis for phospho-S6 (S240/244) (pS6), an indicator of  
114 mTORC1 activity, and phospho-Akt (S473) (pAkt), an indicator of mTORC2 activity. In Raptor-KO neurons,  
115 the mean fluorescence intensity of the pS6 signal was decreased relative to Raptor-Con neurons (Con:  
116  $1.00 \pm 0.05$ , Rap-KO:  $0.25 \pm 0.03$ ,  $p < 0.001$ ; Figure 1A<sub>1-3</sub>), verifying a reduction in mTORC1 activity. The  
117 pAkt signal was, however, increased in Raptor-KO neurons relative to Raptor-Con neurons (Con:  $1.00 \pm$

118 0.05, Rap-KO:  $1.31 \pm 0.06$ ,  $p < 0.001$ ; Figure 1B<sub>1-3</sub>), likely due to release of the negative feedback loop  
 119 from mTORC1 to insulin receptor signaling (Hsu et al., 2011; O'Reilly et al., 2006). Rictor-KO neurons  
 120 showed reduced levels of pAkt immunofluorescence relative to Rictor-Con neurons (Con:  $1.00 \pm 0.03$ ,  
 121 Ric-KO:  $0.56 \pm 0.02$ ,  $p < 0.001$ ; Figure 1E<sub>1-3</sub>), as expected because the S473 residue on Akt is a known  
 122 target of mTORC2. pS6 levels were also reduced in Rictor-KO neurons compared with those of Rictor-  
 123 Con neurons (Con:  $1.00 \pm 0.05$ , Ric-KO:  $0.55 \pm 0.03$ ,  $p < 0.001$ ; Figure 1F<sub>1-3</sub>), likely because reduced Akt  
 124 phosphorylation dampens signaling through the Akt-Tsc-mTORC1 axis. Thus, Cre expression in  
 125 *Raptor*<sup>flox/flox</sup> and *Rictor*<sup>flox/flox</sup> neurons causes distinct biochemical changes consistent with reductions in  
 126 mTORC1 and mTORC2 activity, respectively.

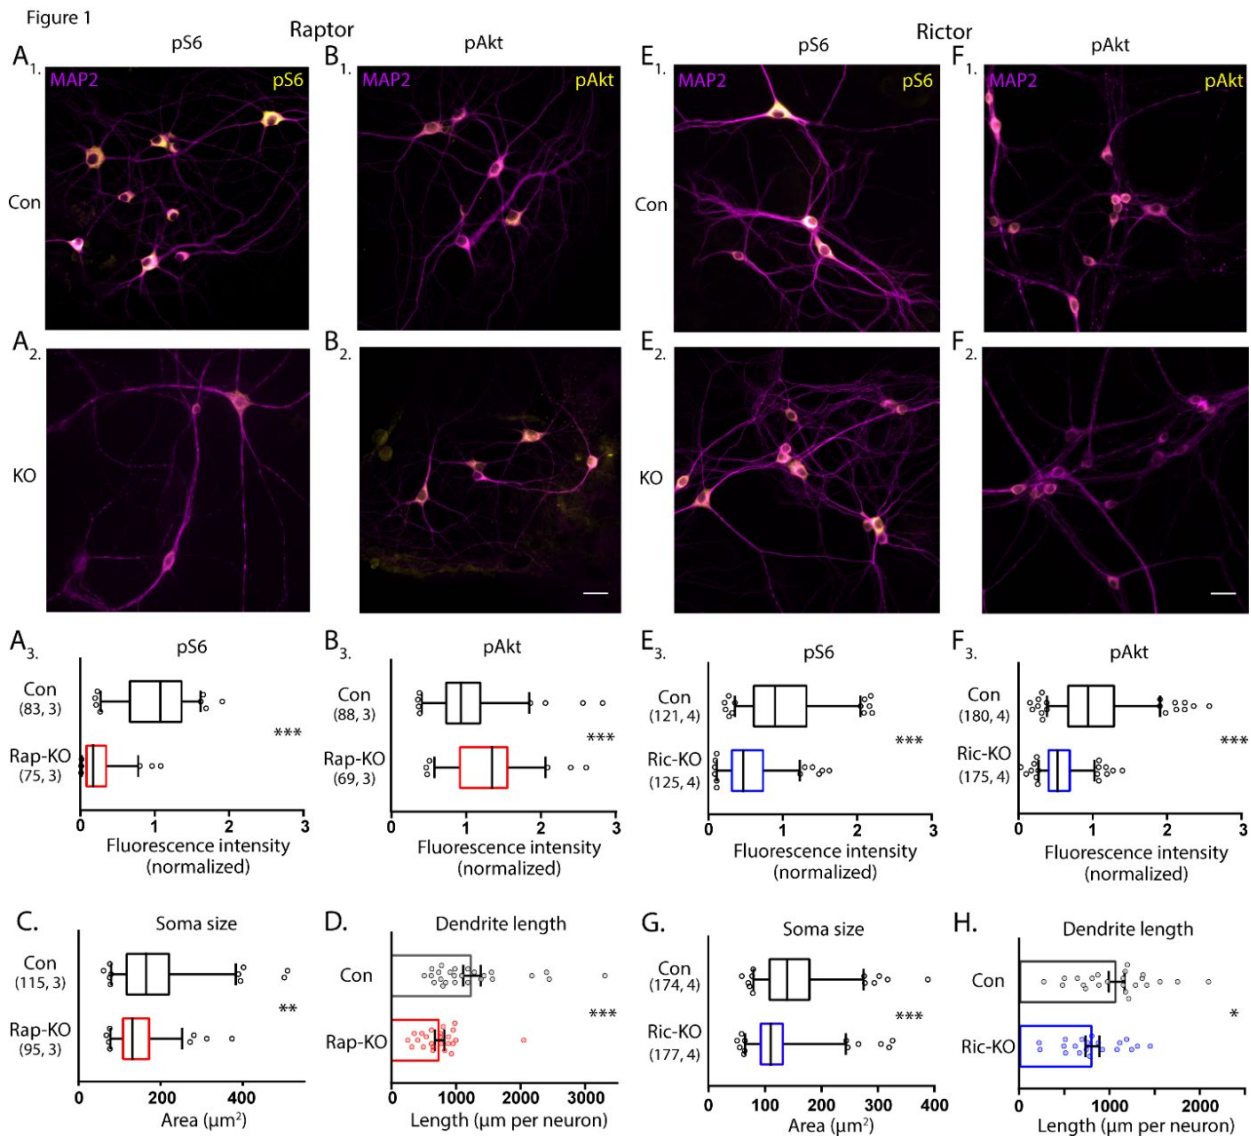

127 **Figure 1. Loss of Raptor or Rictor in primary hippocampal neurons alters mTOR signaling and**  
128 **decreases neuron growth.** A. Representative images of Raptor-Con (A<sub>1</sub>) and Raptor-KO neurons (A<sub>2</sub>) showing  
129 the structure of the neurons revealed by MAP2 immunofluorescence (purple) and the immunofluorescence signal  
130 from phospho-S6 (pS6, yellow) A<sub>3</sub>. Box plot (median and 95%) showing the fluorescence intensity measurements  
131 from the pS6 signal in Raptor-Con and Raptor-KO neurons. B. Representative images of Raptor-Con (B<sub>1</sub>) and  
132 Raptor-KO neurons (B<sub>2</sub>) showing the structure of the neurons revealed by MAP2 immunofluorescence (purple) and  
133 the immunofluorescence signal from phospho-AKT<sub>473</sub> (pAkt, yellow) Scale bar is 25  $\mu$ m. B<sub>3</sub>. Box plot (median and  
134 95%) showing the fluorescence intensity measurements from the pAkt signal in Raptor-Con and Raptor-KO  
135 neurons. C. Box plot (median and 95%) showing the area measurements of the somatic compartment in Raptor-  
136 Con and Raptor-KO neurons. D. Dot plot showing the measurements of the total dendritic length in Raptor-Con  
137 and Raptor-KO neurons and mean  $\pm$  s.e.m. E. Representative images of Rictor-Con (E<sub>1</sub>) and Rictor-KO neurons (E<sub>2</sub>)  
138 showing the structure of the neurons revealed by MAP2 immunofluorescence (purple) and the  
139 immunofluorescence signal from phospho-S6 (pS6, yellow) E<sub>3</sub>. Box plot (median and 95%) showing the  
140 fluorescence intensity measurements from the pS6 signal in Rictor-Con and Rictor-KO neurons. F. Representative  
141 images of Rictor-Con (F<sub>1</sub>) and Rictor-KO neurons (F<sub>2</sub>) showing the structure of the neurons revealed by MAP2  
142 immunofluorescence (purple) and the immunofluorescence signal from phospho-AKT<sub>473</sub> (pAkt, yellow) Scale bar is  
143 25  $\mu$ m. F<sub>3</sub>. Box plot (median and 95%) showing the fluorescence intensity measurements from the pAkt signal in  
144 Rictor-Con and Rictor-KO neurons. G. Box plot (median and 95%) showing the area measurements of the somatic  
145 compartment in Rictor-Con and Rictor-KO neurons. H. Dot plot showing the measurements of the total dendritic  
146 length in Rictor-Con and Rictor-KO neurons and mean  $\pm$  s.e.m. The numbers underneath the groups indicate the  
147 number of neurons analyzed and the number of cultures. \* =  $p < 0.05$ , \*\* =  $p < 0.01$ , \*\*\* =  $p < 0.001$ , as tested with  
148 Generalized Estimating Equations.  
149  
150  
151

152 **Raptor or Rictor loss results in similar effects on neuron morphology and passive membrane**  
153 **properties.**

154 In addition to biochemical markers, mTOR signaling is known to regulate cell size (Edinger &  
155 Thompson, 2002; D. H. Kim et al., 2002; Urbanska, Gozdz, Swiech, & Jaworski, 2012); in particular,  
156 dramatic increases in cell size occur in most cell types following hyperactivation of the mTOR pathway.  
157 To assess alterations in neuron size, we measured neuronal soma area in the cultures following deletion  
158 of *Raptor* and *Rictor*. For Raptor-KO and Rictor-KO neurons, soma areas were reduced by almost 20%  
159 compared with those of their respective controls (Con:  $180 \pm 8 \mu\text{m}^2$ , Rap-KO:  $146 \pm 6 \mu\text{m}^2$ ,  $p = 0.007$ ;  
160 Con:  $151 \pm 5 \mu\text{m}^2$ , Ric-KO:  $126 \pm 4 \mu\text{m}^2$ ,  $p < 0.001$ ; Figure 1C and 1G).

161 Previously, mTORC1 and mTORC2 were also shown to regulate dendritic growth (Urbanska et  
162 al., 2012). Thus, we visualized dendrites in single-neuron cultures, where they can be well-resolved by  
163 immunostaining with an antibody against MAP2. We reconstructed the dendritic tree of each neuron  
164 and found that total dendritic length was reduced by both mTORC1 inactivation (Con:  $1260 \pm 116 \mu\text{m}$ ,  
165 Rap-KO:  $747 \pm 70 \mu\text{m}$ ,  $p < 0.001$ ; Figure 1D), and mTORC2 inactivation (Con:  $1035 \pm 76 \mu\text{m}$ , Ric-KO:  $815 \pm$   
166  $78 \mu\text{m}$ ,  $p = 0.043$ ; Figure 1H). These data verify that a reduction in mTORC1 or mTORC2 activity is  
167 sufficient to decrease neuronal soma area and dendritic length, which agrees with two previous studies  
168 comparing the effects of mTORC1 and mTORC2 inactivation (Angliker et al., 2015; Urbanska et al., 2012),  
169 and confirm that both mTOR complexes are required for proper neuronal morphology.

170 The decrease in soma size and dendritic length predicts that the passive membrane properties  
171 of Raptor-KO and Rictor-KO neurons will be altered. To test this, we performed current-clamp analysis of  
172 neurons from each group to assess alterations in passive membrane properties and action potential (AP)  
173 dynamics (Table 1). As may be expected from their decreased soma size, the input resistances of Raptor-  
174 KO and Rictor-KO neurons were increased compared with those of their respective controls (Con:  $277 \pm$   
175  $37 \text{ M}\Omega$ , Rap-KO:  $442 \pm 33 \text{ M}\Omega$ ,  $p = 0.003$ ; Con:  $237 \pm 28 \text{ M}\Omega$ , Ric-KO:  $329 \pm 37 \text{ M}\Omega$ ,  $p = 0.033$ ). Also



176 reflective of their reduced soma size, the membrane capacitance ( $C_m$ ) of Raptor-KO neurons was  
 177 significantly lower than that of Raptor-Con neurons (Con:  $138 \pm 8.2$  pF, Rap-KO:  $87 \pm 7.4$  pF,  $p < 0.001$ );  
 178 however, the effect of Rictor loss on reducing the  $C_m$  did not reach statistical significance (Con:  $173 \pm 14$   
 179 pF, Ric-KO:  $135 \pm 10$  pF,  $p = 0.065$ ).

180 **Table 1.**

| Raptor-KO                    |                |                 |         |                      |
|------------------------------|----------------|-----------------|---------|----------------------|
|                              | Con, n = 13    | Rap-KO, n = 15  | p value | 95% CI of difference |
| Resting Potential, mV        | $53.3 \pm 2.2$ | $55.9 \pm 2.0$  | 0.38    | -3.4 - 8.6           |
| Input Resistance, M $\Omega$ | $277 \pm 37$   | $442 \pm 33$    | 0.003   | 63 - 268             |
| Capacitance, pF              | $138 \pm 8.2$  | $87 \pm 7.4$    | < 0.001 | -73.2 - -27.8        |
| Time constant, ms            | $36.8 \pm 2.9$ | $36.2 \pm 2.6$  | 0.89    | -8.6 - 7.4           |
| AP threshold, mV             | $37.1 \pm 2.2$ | $38.0 \pm 2.0$  | 0.76    | -5.1 - 7.0           |
| AP amplitude, mV             | $77.8 \pm 3.5$ | $67.7 \pm 3.1$  | 0.043   | -19.7 - -0.34        |
| Rictor-KO                    |                |                 |         |                      |
|                              | Con, n = 15    | Ric-KO, n = 17  | p value | 95% CI of difference |
| Resting Potential, mV        | $53.5 \pm 1.1$ | $52.2 \pm 1.2$  | 0.41    | -4.5 - 1.8           |
| Input Resistance, M $\Omega$ | $237 \pm 28$   | $329 \pm 37$    | 0.033   | 6 - 176              |
| Capacitance, pF              | $173 \pm 14$   | $135 \pm 10$    | 0.065   | -78.6 - 2.7          |
| Time constant, ms            | $37.4 \pm 5.1$ | $40.3 \pm 5.2$  | 0.65    | -9.6 - 15.4          |
| AP threshold, mV             | $35.0 \pm 1.3$ | $32.3 \pm 1.3$  | 0.14    | -6.5 - 0.99          |
| AP amplitude, mV             | $73.9 \pm 3.2$ | $69.0 \pm 2.99$ | 0.27    | -13.8 - 4.1          |

181

182 **Table 1. Summary of the measurements of basic membrane properties.** Measurements are estimated

183 marginal means  $\pm$  s.e.m. Significance tested with Generalized Estimating Equations.

184 **Deletion of *Raptor* decreases glutamatergic synaptic strength in single-neuron cultures by decreasing**  
185 **quantal size and synapse number.**

186 To identify specific roles for mTORC1 and mTORC2 signaling in the regulation of glutamatergic  
187 synaptic transmission, we used a single-neuron culture system, which allows for the quantification of  
188 multiple parameters of pre- and postsynaptic function in the absence of network compensation and  
189 synaptic plasticity. We first performed whole-cell voltage-clamp recordings of glutamatergic neurons  
190 and evoked APs to examine evoked excitatory postsynaptic currents (eEPSCs) from Raptor-Con and  
191 Raptor-KO single neurons. Although the fast component tau of the eEPSC decay was unaltered (Con:  
192  $5.65 \pm 0.32$ , Rap-KO:  $5.67 \pm 0.31$ ,  $p = 0.45$ ; Figure 2A<sub>3</sub>), the eEPSC amplitudes were reduced by almost  
193 60% in Raptor-KO neurons relative to those of Raptor-Con neurons (Con:  $6.65 \pm 1.38$  nA, Rap-KO:  $2.80 \pm$   
194  $0.57$  nA,  $p = 0.003$ ; Figure 2A<sub>1,2</sub>), showing that intact mTORC1 signaling is necessary for normal evoked  
195 glutamatergic transmission.

196 The observed reduction in evoked synaptic strength following Raptor loss could be due to  
197 changes in the amplitude of the postsynaptic response to single SV fusion (quantal size) or the number  
198 of fusion-competent SVs (readily releasable pool, RRP). First, to test for changes in quantal size, we  
199 recorded the spontaneous release of miniature EPSCs (mEPSCs) and measured their amplitude and  
200 decay time constants, properties that are primarily dictated by postsynaptic ionotropic receptor levels  
201 and/or activity. Raptor-KO significantly decreased the mEPSC amplitude (Con:  $27.8 \pm 1.9$  pA, Rap-KO:  
202  $21.5 \pm 1.4$  pA,  $p = 0.006$ ; Figure 2B<sub>1,2</sub>), but did not affect the decay time (Con:  $3.48 \pm 0.14$  ms, Rap-KO:  
203  $3.40 \pm 0.13$  ms,  $p = 0.68$ ; Figure 2B<sub>3</sub>), when compared with those of Raptor-Con neurons. This reduction  
204 in quantal size implicates a postsynaptic impairment in Raptor-KO neurons that at least partially  
205 accounts for their decrease in evoked glutamatergic release.

206 Next, we assessed the number of SVs in the RRP following *Raptor* deletion, which can be directly  
207 quantified in a single neuron by applying a pulse of hypertonic sucrose (500 mM) to induce the

208 exocytosis of all of a neuron's fusion-competent vesicles (Rosenmund & Stevens, 1996). The integral of  
209 the transient current during sucrose application represents the total charge contained in the RRP, and  
210 the total number of vesicles in the RRP can then be calculated by dividing the total charge by the  
211 average charge of the miniature events from each neuron. We found that the sucrose-induced charge  
212 transfer, or the RRP charge, in glutamatergic Raptor-KO neurons was decreased by almost 60%  
213 compared with that of Raptor-Con neurons (Con:  $767 \pm 127$  pC, Rap-KO:  $337 \pm 53$  pC,  $p = 0.002$ ; Figure  
214 2C<sub>1,2</sub>). As a result, the mean number of SVs contained in the RRP of Raptor-KO glutamatergic neurons  
215 was reduced by almost 50% relative to that of Raptor-Con neurons (Con:  $7145 \pm 1415$  vesicles, Rap-KO:  
216  $3664 \pm 718$  vesicles  $p = 0.008$ ; Figure 2C<sub>3</sub>).

217         The observed decrease in the number of SVs in the RRP could be due to a decrease in the total  
218 number of synapses per neuron or to a decrease in the number of fusion-competent SVs per synapse. To  
219 distinguish between these possibilities, we visualized glutamatergic synapses and dendrites by  
220 immunostaining with antibodies against VGLUT1 and MAP2. We found that the number of glutamatergic  
221 synapses per neuron was decreased by approximately 40% due to Raptor loss (Con:  $721 \pm 106$   
222 synapses/neuron, Rap-KO:  $430 \pm 65$  synapses/neuron,  $p = 0.02$ ; Figure 2D<sub>1,2</sub>). However, based on the  
223 mean values for the RRP and number of synapses, we estimated similar numbers of fusion-competent  
224 SVs per synapse in Raptor-Con neurons (9.91 SVs/synapse) and Raptor-KO neurons (8.52 SVs/synapse).  
225 Taken together, these data suggest that the reduction in the RRP caused by *Raptor* loss is due to an  
226 impairment in synapse formation or maintenance, and not the number of SVs at each synapse.

227

228

229

230

231

Figure 2

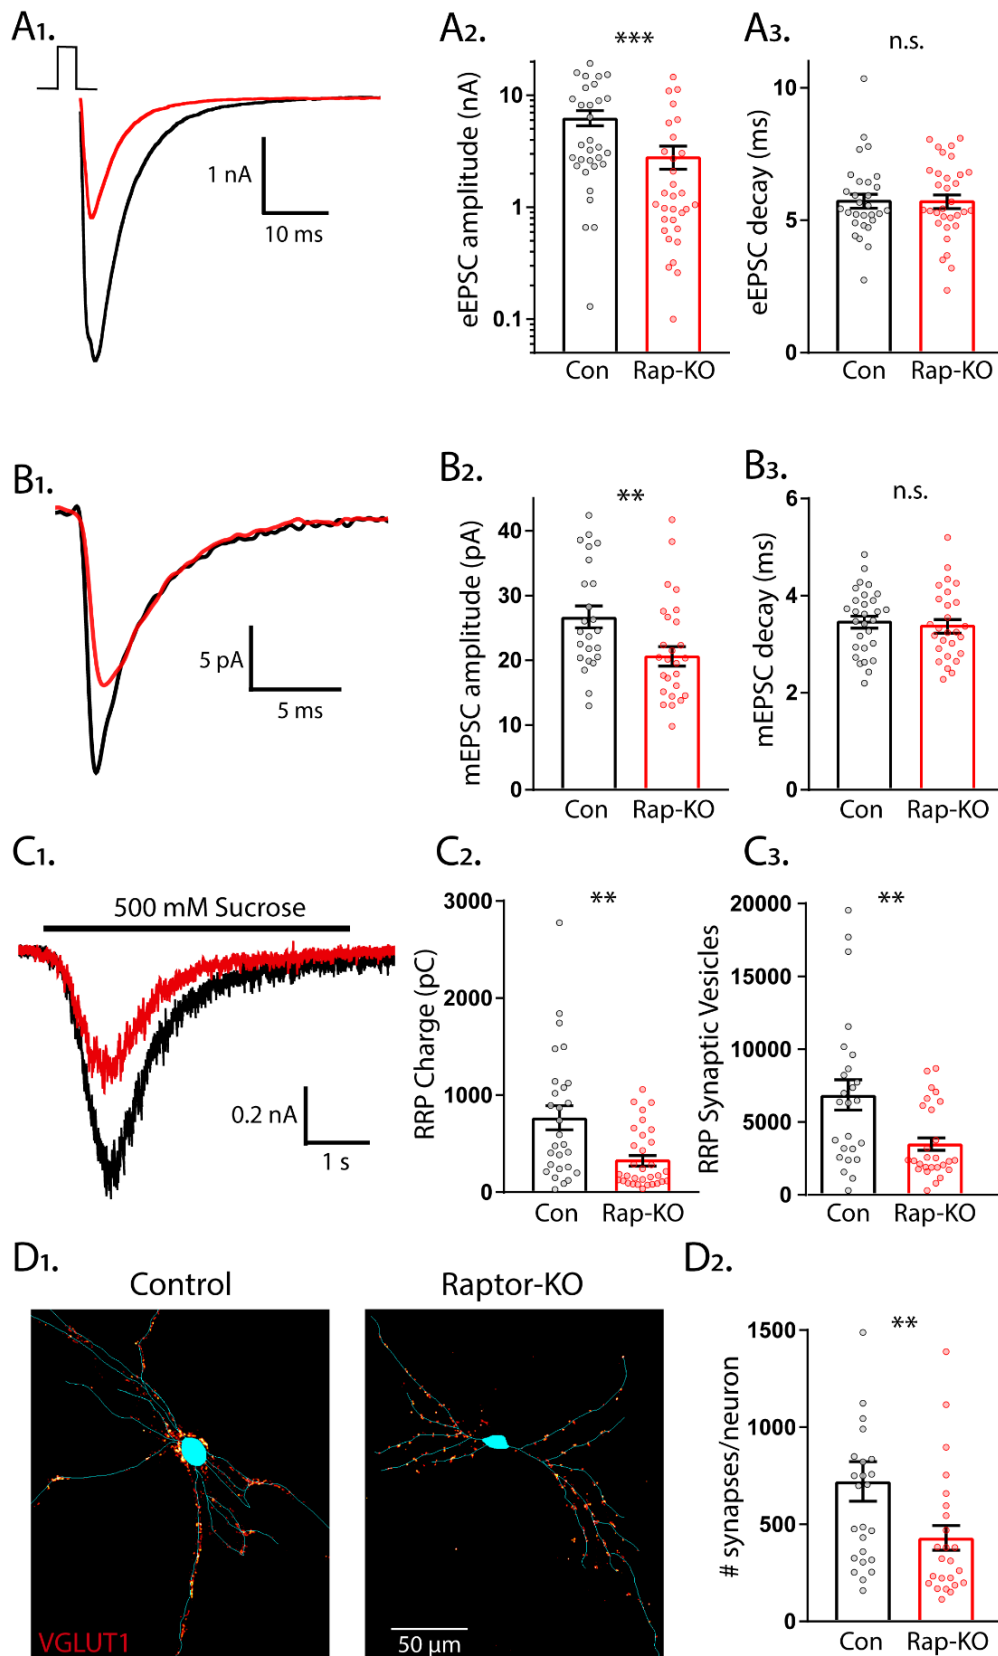

233 **Figure 2. Loss of Raptor decreases the strength of evoked excitatory synaptic transmission via changes**  
234 **in quantal size and synapse number.** A<sub>1</sub>. Example traces of evoked EPSCs recorded from single-neuron primary  
235 hippocampal cultures of Raptor-Con (black) and Raptor-KO (red) neurons. A<sub>2</sub>. Plot showing the values of peak EPSC  
236 amplitudes recorded from Raptor-Con (black) and Raptor-KO (red) neurons on a logarithmic scale. A<sub>3</sub>. Plot showing  
237 the values of single exponential fits to the fast component of the EPSC decay recorded from Raptor-Con (black) and  
238 Raptor-KO (red) neurons on a linear scale. B<sub>1</sub>. Example traces of average miniature EPSCs recorded from single-  
239 neuron primary hippocampal cultures of Raptor-Con (black) and Raptor-KO (red) neurons. B<sub>2</sub>. Plot showing the  
240 values of mEPSC peak amplitudes recorded from Raptor-Con (black) and Raptor-KO (red) neurons. B<sub>3</sub>. Plot showing  
241 the distributions of mEPSC decay time constants recorded from Raptor-Con (black) and Raptor-KO (red) neurons.  
242 C<sub>1</sub>. Example traces of the current response to 500 mM sucrose application recorded from single-neuron primary  
243 hippocampal cultures of Raptor-Con (black) and Raptor-KO (red) neurons. The black line indicates the time of  
244 sucrose application. C<sub>2</sub>. Plot showing the values of the charge contained in the readily releasable pool (RRP) of  
245 Raptor-Con (black) and Raptor-KO (red) neurons, as determined by integrating the sucrose response after  
246 subtracting the steady state component. C<sub>3</sub>. Plot showing the number of vesicles contained in the RRP of Raptor-  
247 Con (black) and Raptor-KO (red) neurons, as determined by dividing the RRP charge by the mean mEPSC charge for  
248 each neuron. D<sub>1</sub>. Representative images showing fluorescence intensity in a red color look up table (LUT) from VGLUT1  
249 immunostaining superimposed on a tracing of the cell body and dendrites from a Raptor-Con (left) and a Raptor-  
250 KO (right) neuron. D<sub>2</sub>. Plot showing the values of synapse number per neuron for Raptor-Con (black) and Raptor-  
251 KO (red) neurons. For all dot plots, each dot represents the mean response from one neuron and the bars show  
252 the estimated marginal means and standard errors. \*\* indicates a p value of <0.01, \*\*\* indicates p < 0.001 and n.s.  
253 indicates p > 0.05, as tested with Generalized Estimating Equations.  
254  
255  
256  
257

258 **Deletion of *Rictor* decreases glutamatergic synaptic strength in single-neuron cultures without**  
259 **affecting quantal size and synapse number.**

260 Next, we examined eEPSCs from Rictor-Con and Rictor-KO single neurons. Like Raptor-KO  
261 neurons, the eEPSC amplitudes were reduced by almost 60% relative to Rictor-Con neurons (Con:  $4.70 \pm$   
262  $0.78$  nA, Ric-KO:  $1.90 \pm 0.57$  nA,  $p = 0.001$ ; Figure 3A<sub>1,2</sub>), with no effect on the fast component decay  
263 time (Con:  $5.25 \pm 0.25$ , Ric-KO:  $5.53 \pm 0.24$ ,  $p = 0.55$ ; Figure 3A<sub>3</sub>). Because of this similarity in the effect  
264 on the evoked response, and because our immunostaining indicated that loss of *Rictor* decreased  
265 mTORC1 activity, we hypothesized that the physiological mechanisms would be shared (i.e. quantal size  
266 and synapse number reductions). Instead, we found that mTORC2 inhibition via *Rictor* loss did not  
267 significantly affect the mEPSC amplitude (Con:  $19.9 \pm 1.1$  pA, Ric-KO:  $17.7 \pm 0.9$  pA,  $p = 0.11$ ; Figure 3B<sub>1,2</sub>)  
268 or decay time (Con:  $3.14 \pm 0.11$  ms, Ric-KO:  $3.10 \pm 0.10$  ms,  $p = 0.76$ ; Figure 3B<sub>3</sub>) relative to those of  
269 Rictor-Con neurons, suggesting that, unlike in Raptor-KO neurons, quantal size alterations do not  
270 contribute to the decreased glutamatergic synaptic strength observed following loss of *Rictor*.

271 We next determined whether alterations in the RRP size contributed to the reduced eEPSC  
272 amplitude in Rictor-KO neurons. The sucrose-induced charge transfer and the number of SVs in the RRP  
273 were decreased following *Rictor* deletion, although only by approximately 35% (Con:  $474 \pm 59$  pC, Ric-  
274 KO:  $304 \pm 37$  pC,  $p = 0.011$ ; and Con:  $6441 \pm 857$  vesicles, Ric-KO:  $4178 \pm 535$  vesicles,  $p = 0.024$ ; Figure  
275 3C<sub>1-3</sub>). In contrast to the reduced synapse number caused by *Raptor* loss, the number of glutamatergic  
276 synapses per neuron was not decreased by *Rictor* loss (Con:  $764 \pm 133$  synapses/neuron, Ric-KO:  $771 \pm$   
277  $140$  synapses/neuron,  $p = 0.97$ ; Figure 3D<sub>1,2</sub>), even though total dendritic length was reduced (Figure  
278 1H). Based on these numbers, we estimated that the number of fusion-competent SVs per synapse was  
279 reduced from 8.43 SVs/synapse in Rictor-Con neurons to 5.42 SVs/synapse in Rictor-KO neurons, which  
280 would partially account for the 60% reduction in eEPSC amplitude. Thus, although mTORC1 and mTORC2

281 inactivation both decreased eEPSC strength, our data suggest that the underlying physiological  
282 mechanisms are quite different.

Figure 3

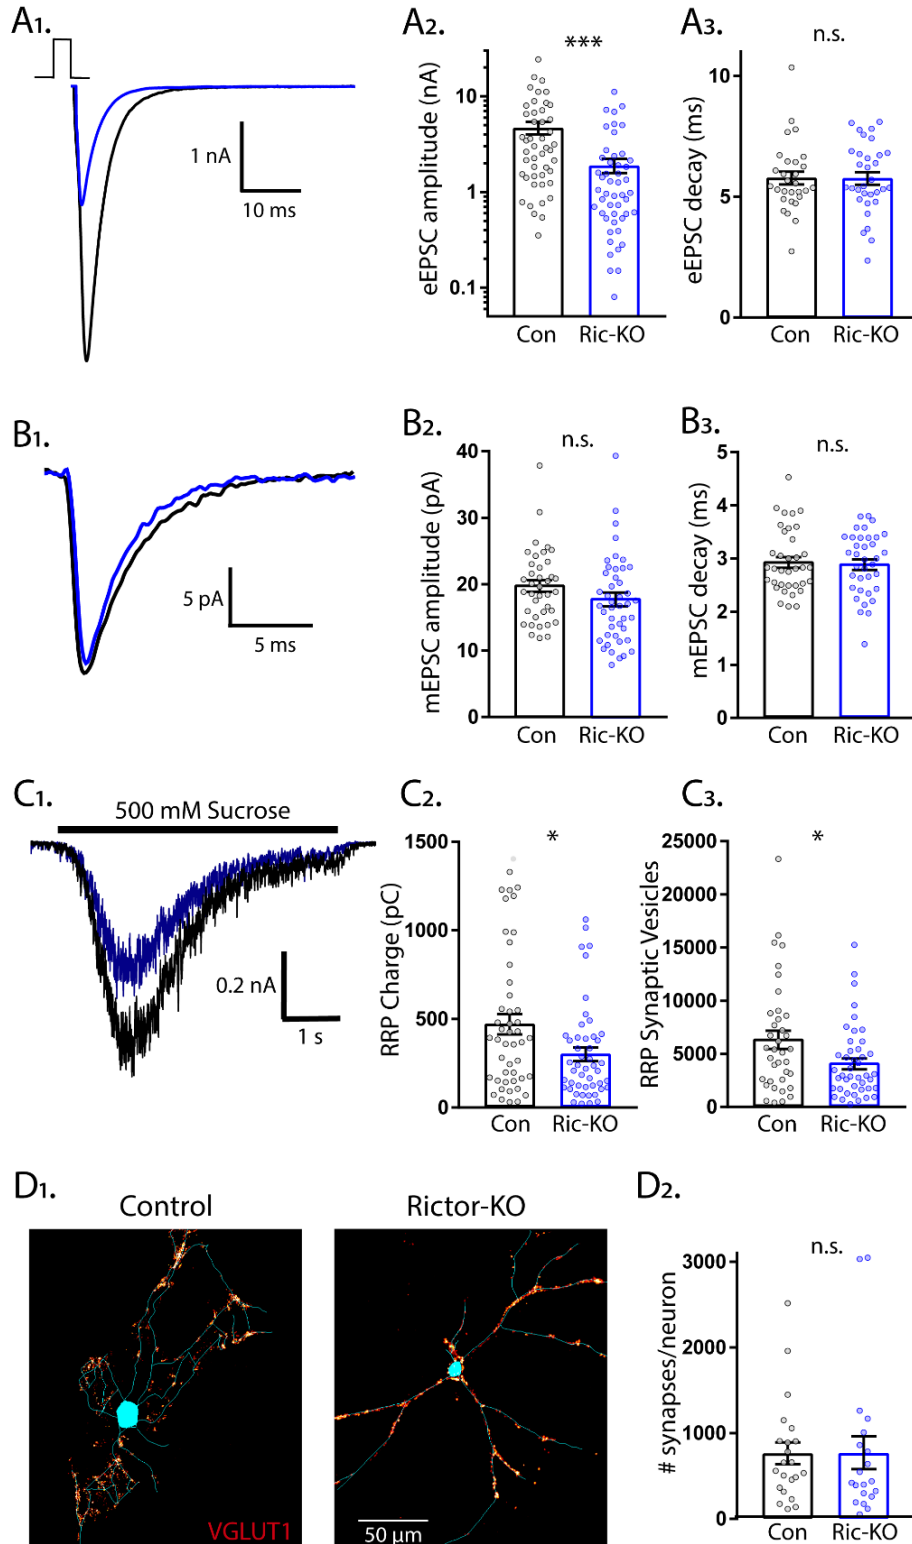

283 **Figure 3. Loss of Rictor decreases the strength of evoked excitatory synaptic transmission without**  
284 **altering quantal size or synapse number.** A<sub>1</sub>. Example traces of evoked EPSCs recorded from single-neuron  
285 primary hippocampal cultures of Rictor-Con (black) and Rictor-KO (blue) neurons. A<sub>2</sub>. Plot showing the values of  
286 peak EPSC amplitudes recorded from Rictor-Con (black) and Rictor-KO (blue) neurons on a logarithmic scale. A<sub>3</sub>.  
287 Plot showing the values of single exponential fits to the fast component of the EPSC decay recorded from Rictor-  
288 Con (black) and Rictor-KO (blue) neurons on a linear scale. B<sub>1</sub>. Example traces of average miniature EPSCs recorded  
289 from single-neuron primary hippocampal cultures of Rictor-Con (black) and Rictor-KO (blue) neurons. B<sub>2</sub>. Plot  
290 showing the values of mEPSC peak amplitudes recorded from Rictor-Con (black) and Rictor-KO (blue) neurons. B<sub>3</sub>.  
291 Plot showing the distributions of mEPSC decay time constants recorded from Rictor-Con (black) and Rictor-KO  
292 (blue) neurons. C<sub>1</sub>. Example traces of the current response to 500 mM sucrose application recorded from single-  
293 neuron primary hippocampal cultures of Rictor-Con (black) and Rictor-KO (blue) neurons. The black line indicates  
294 the time of sucrose application. C<sub>2</sub>. Plot showing the values of the charge contained in the readily releasable pool  
295 (RRP) of Rictor-Con (black) and Rictor-KO (blue) neurons, as determined by integrating the sucrose response after  
296 subtracting the steady state component. C<sub>3</sub>. Plot showing the number of vesicles contained in the RRP of Rictor-  
297 Con (black) and Rictor-KO (blue) neurons, as determined by dividing the RRP charge by the mean mEPSC charge for  
298 each neuron. D<sub>1</sub>. Representative images showing fluorescence intensity in a red color look up table (LUT) from VGLUT1  
299 immunostaining superimposed on a tracing of the cell body and dendrites from a Rictor-Con (left) and a Rictor-KO  
300 (right) neuron. D<sub>2</sub>. Plot showing the values of synapse number per neuron for Rictor-Con (black) and Rictor-  
301 KO (blue) neurons. For all dot plots, each dot represents the mean response from one neuron and the bars show  
302 the estimated marginal means and standard errors of the mean. \*\* indicates a p value of <0.01, \*\*\* indicates p <  
303 0.001 and n.s. indicates p > 0.05, as tested with Generalized Estimating Equations.

304

305 **Rictor loss decreases the probability and rate of evoked SV release and increases paired pulse ratios,**  
306 **but Raptor loss does not.**

307 For Raptor-KO neurons, the combined decreases in quantal size and the number of SVs in the  
308 RRP may be sufficient to account for the magnitude of the decrease in the evoked glutamatergic



309 response. For Rictor-KO neurons, however, the decrease in the evoked glutamatergic response was  
310 greater than the decrease in the RRP, indicating that evoked SV release itself may also be impaired. We  
311 tested this in three ways. First, we calculated the probability that an SV fuses in response to an AP  
312 (vesicular release probability,  $P_{vr}$ ) by dividing the number of vesicles released in response to AP  
313 stimulation by the number of vesicles in the RRP. The  $P_{vr}$  was not different between Raptor-KO and  
314 Raptor-Con neurons (Con:  $0.092 \pm 0.012$ , Rap-KO:  $0.086 \pm 0.012$ ,  $p = 0.72$ ; Figure 4A). However, Rictor-  
315 KO neurons showed a reduced  $P_{vr}$  from  $0.118 \pm 0.013$ , in Rictor-Con neurons, to  $0.083 \pm 0.009$  ( $p = 0.010$ ;  
316 Figure 4D), suggesting that Rictor loss reduces the probability of evoked vesicle fusion. Next, we  
317 calculated the peak rate at which SVs were released during the eEPSC by deconvolving the eEPSC with  
318 the mean mEPSC shape for each neuron (Aumann & Parnas, 1991; Diamond & Jahr, 1995;  
319 Schneggenburger & Neher, 2000). Again, we found no effect of mTORC1 inactivation (Con:  $26.0 \pm 3.3 \text{ s}^{-1}$ ,  
320 Rap-KO:  $26.1 \pm 3.2 \text{ s}^{-1}$ ,  $p = 0.98$ ; Figure 4B<sub>1,2</sub>), but mTORC2 inactivation decreased the maximum rate of  
321 SV release from  $22.8 \pm 3.38 \text{ s}^{-1}$  in Rictor-Con neurons, to  $11.0 \pm 1.6 \text{ s}^{-1}$  in Rictor-KO neurons ( $p = 0.001$ ;  
322 Figure 4E<sub>1,2</sub>).

323 As a third test of SV release changes, we evoked two presynaptic APs in close succession and  
324 divided the second postsynaptic response by the first to measure paired-pulse ratios (PPRs) at 25, 50,  
325 100, and 200 ms interstimulus intervals (ISIs) for each neuron group. Generally, in neurons with a lower  
326  $P_{vr}$ , the second stimulus evokes a larger response than that evoked by the first, resulting in a higher PPR.  
327 Conversely, in neurons with a higher  $P_{vr}$ , the second stimulus evokes a smaller response than that  
328 evoked by the first, resulting in a lower  $P_{vr}$ . In agreement with the  $P_{vr}$  measurements, there was no effect  
329 of Raptor loss on PPRs at any of the ISIs tested (main effect of group,  $p = 0.35$ ; Figure 4C<sub>1,2</sub>). Similarly  
330 consistent with the  $P_{vr}$  measurements, the Rictor-KO neurons, which had a reduced  $P_{vr}$ , showed a  
331 significant increase in PPRs at all ISIs tested compared with those of Rictor-Con neurons (main effect of  
332 group,  $p < 0.001$ ; Figure 4F<sub>1,2</sub>). Taken together, these data indicate that the reductions in quantal size

333 and SV number in the RRP of Raptor-KO neurons account for the decreased eEPSC amplitude following  
334 inactivation of mTORC1. More importantly, our results strongly suggest that Rictor, but not Raptor, loss  
335 leads to presynaptic impairments in evoked vesicle release.

Figure 4

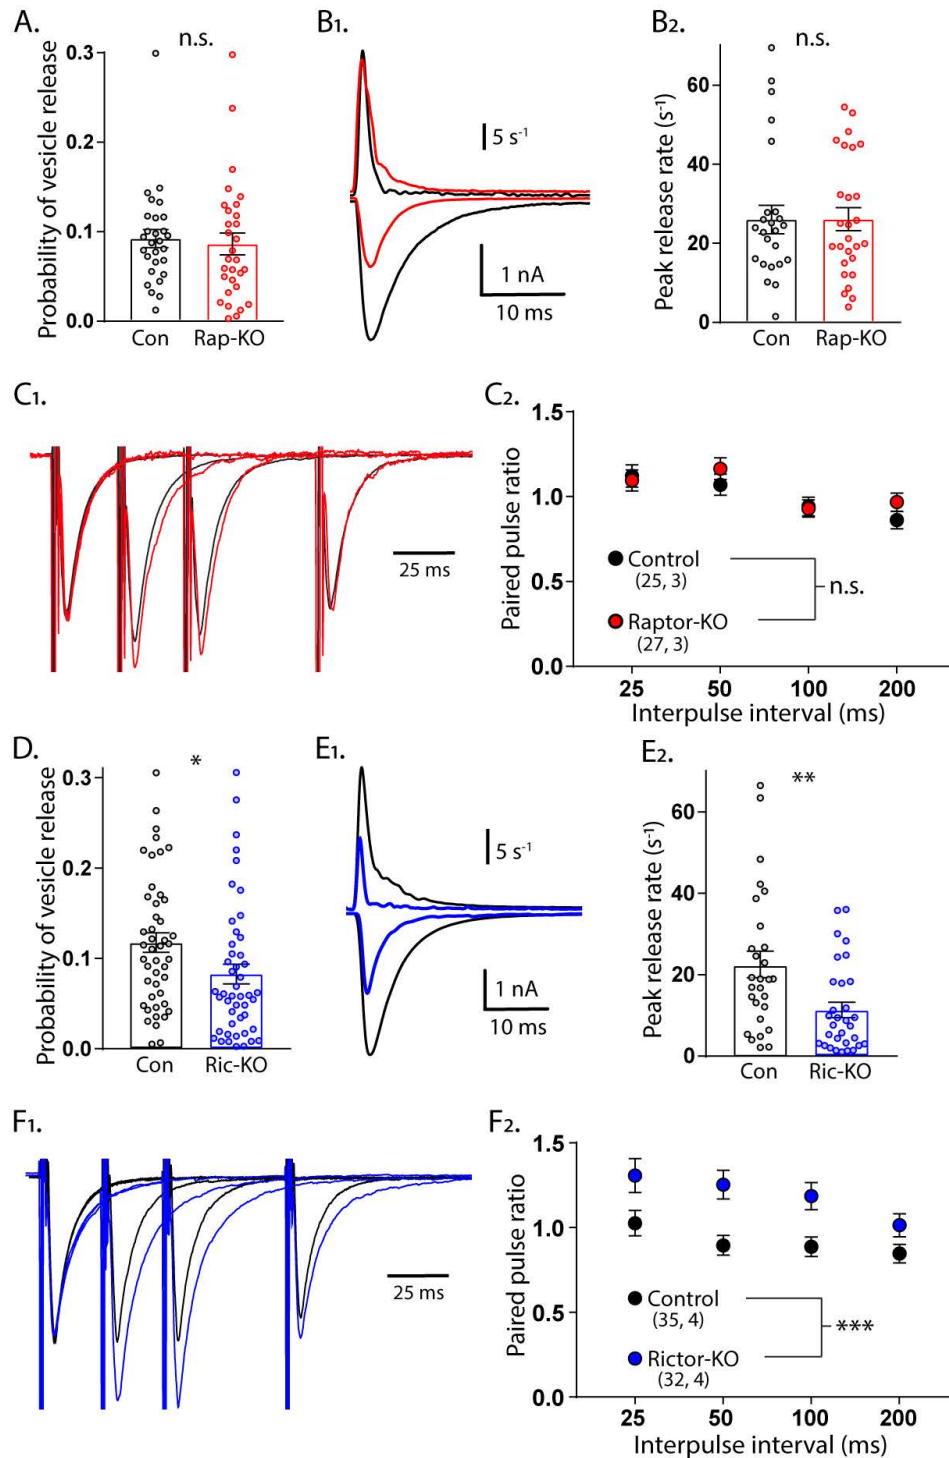

340 **Figure 4. Loss of Rictor reduces evoked SV release efficiency but Raptor loss does not.** A. Plot showing  
341 no difference in the vesicular release probability of Raptor-Con (black) and Raptor-KO (red) neurons. B<sub>1</sub>. Example  
342 traces showing the rate of SV release (top traces) over their corresponding EPSCs from Raptor-Con (black) and  
343 Raptor-KO (red) neurons. B<sub>2</sub>. Plot of the peak vesicle release rates of Raptor-Con (black) and Raptor-KO (red)  
344 neurons. C<sub>1</sub>. Example traces of EPSCs evoked in response to 2 ms depolarizations spaced at 25, 50, and 100 ms. The  
345 three sweeps at different intervals are overlaid, as are the responses from Raptor-Con (black) and Raptor-KO  
346 (red) neurons. The values are normalized to the peak amplitude of the first EPSC in each sweep. C<sub>2</sub>. Summary data  
347 showing the estimated marginal means and standard errors for Raptor-Con (black) and Raptor-KO (red) groups at  
348 different interpulse intervals. D. Plot showing the decrease in vesicular release probability between Rictor-Con  
349 (black) and Rictor-KO (blue) neurons. E<sub>1</sub>. Example traces showing the rate of SV release (top traces) over their  
350 corresponding EPSCs from Rictor-Con (black) and Rictor-KO (blue) neurons. E<sub>2</sub>. Plot of the peak vesicle release  
351 rates of Raptor-Con (black) and Raptor-KO (red) neurons. F<sub>1</sub>. Example traces of EPSCs evoked in response to 2 ms  
352 depolarizations spaced at 25, 50, and 100 ms. The three sweeps at different intervals are overlaid, as are the  
353 responses from Rictor-Con (black) and Rictor-KO (blue) neurons. The values are normalized to the peak amplitude  
354 of the first EPSC in each sweep. F<sub>2</sub>. Summary data showing the estimated marginal means and standard errors for  
355 Rictor-Con (black) and Raptor-KO (red) groups at different interpulse intervals. \* indicates  $p < 0.05$ , \*\* indicates  $p <$   
356  $0.01$ , \*\*\* indicates  $p < 0.001$ , and n.s. =  $p > 0.05$ , effect of group tested with Generalized Estimating Equations.

357

358

359

360

361

362

363

364

365

366 **Postsynaptic loss of Raptor recapitulates the decrease in evoked EPSC amplitude, but Rictor does not.**

367 The experiments in the single-neuron cultures indicate that the effects of Raptor loss on eEPSCs  
368 are mainly postsynaptic, whereas those of Rictor loss are mainly presynaptic. In single-neuron cultures,  
369 however, the pre- and postsynaptic compartments are genetically identical, making it difficult to  
370 definitively determine whether a synaptic change is pre- or postsynaptic. To test the hypothesis that  
371 mTORC1 regulates eEPSC strength via postsynaptic mechanisms, whereas mTORC2 does not, we  
372 recorded postsynaptic responses simultaneously in pairs of control and Raptor-KO or Rictor-KO neurons  
373 evoked by optogenetic stimulation of wild-type neurons in a traditional mass-neuron culture (Figure 5A).  
374 We found that the light-evoked (le)EPSC amplitudes evoked onto Raptor-KO neurons were significantly  
375 smaller than those onto partner control neurons (Con:  $330 \pm 63$  pA, Rap-KO:  $146 \pm 28$  pA,  $p < 0.001$ ;  
376 Figure 5B<sub>1-3</sub>). Moreover, the magnitude of this decreased amplitude was equivalent to that initially  
377 observed in the eEPSCs recorded from the Raptor-KO single-neuron culture, at almost 60%. Conversely,  
378 the leEPSC amplitudes evoked onto Rictor-KO neurons were unaltered relative to those of control  
379 neurons (Con:  $353 \pm 92$  pA, Ric-KO:  $357 \pm 93$  pA,  $p = 0.97$ ; Figure 5C<sub>1-3</sub>). These data suggest that Raptor,  
380 but not Rictor, is required at the postsynapse to facilitate evoked glutamatergic synaptic transmission.

Figure 5

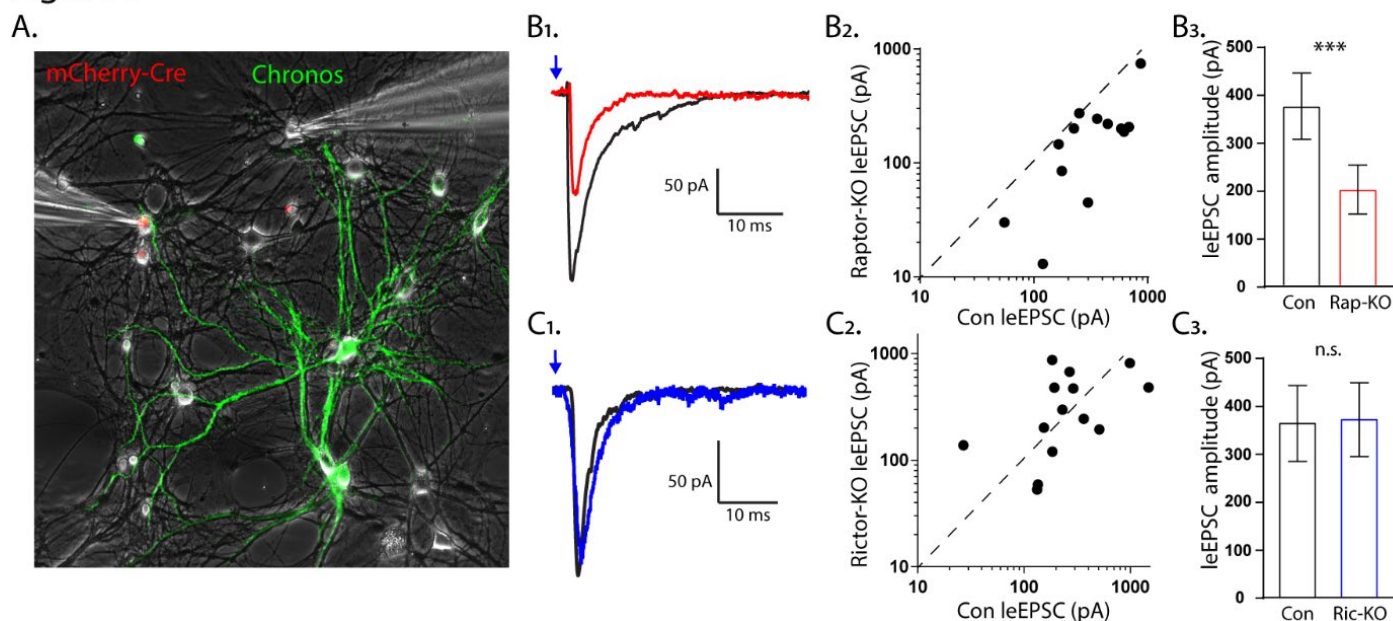

382 **Figure 5. The effect of Raptor loss on evoked EPSCs, but not Rictor, is due to postsynaptic impairments.**

383 A<sub>1</sub>. Representative image illustrating the experimental setup. The red fluorescence from the mCherry-Cre and the  
384 green fluorescence from the optogenetic protein Chronos fused to GFP are shown overlaid on a phase contrast  
385 image showing the patch pipettes attached to one Cre-positive (left pipette) and one Cre-negative (right pipette)  
386 neuron. B<sub>1</sub>. Example light-evoked (le)EPSCs obtained simultaneously from a control (black) and a Raptor-KO (red)  
387 neuron held at -55 mV in response to a 2 ms flash of blue light. B<sub>2</sub>. Scatter plot showing the leEPSC responses of  
388 neuron pairs to blue light stimulation. The peak amplitude from the control neuron in each pair is represented by  
389 the symbol's value on the x-axis, and the peak amplitude of the Raptor-KO neuron is represented by the symbol's  
390 value on the y-axis. Pairs in which the KO response is smaller than the control response will be below the dashed  
391 line. B<sub>3</sub>. Bar graph showing the leEPSC amplitudes (mean ± s.e.m.) of control (black) and Raptor-KO (red) neurons.  
392 C<sub>1</sub>. Example leEPSCs obtained simultaneously from a control (black) and a Rictor-KO (blue) neuron held at -55 mV  
393 in response to a 2 ms flash of blue light. C<sub>2</sub>. Scatter plot showing the leEPSC responses of neuron pairs to blue light  
394 stimulation. The peak amplitude from the control neuron in each pair is represented by the symbol's value on the  
395 x-axis, and the peak amplitude of the Rictor-KO neuron is represented by the symbol's value on the y-axis. C<sub>3</sub>. Bar  
396 graph showing the leEPSC amplitudes (mean ± s.e.m.) of control (black) and Rictor-KO (blue) neurons. \*\*\*  
397 indicates  $p < 0.001$  and n.s. =  $p > 0.05$ , effect of group tested with Generalized Estimating Equations.

398

399

400

401

402

403

404

405

406

407

408 **mTORC1 regulates the rate constant for spontaneous SV fusion, but mTORC2 does not.**

409           Thus far, we have shown that inactivation of mTORC1 or mTORC2 reduced both evoked EPSC  
410 amplitude and RRP size, however, impairments to evoked SV fusion were only observed following  
411 mTORC2 inactivation. A decrease in the number of vesicles in the RRP often leads to a decrease in both  
412 evoked and spontaneous release, because there is a decreased number of SVs available for fusion,  
413 either in response to an action potential or spontaneously (Schneppenburger & Rosenmund, 2015). To  
414 assess whether spontaneous release is altered by mTORC1 or mTORC2 inactivation, we recorded the  
415 frequency of mEPSC events in single-neuron cultures, and then calculated the spontaneous release rate  
416 constant (SRR) by dividing the miniature event frequency by the number of SVs in the RRP for each  
417 neuron. The SRR is the rate at which an individual SV fuses with the plasma membrane in the absence of  
418 stimulation, and the reciprocal of the rate constant is the mean dwell time of an SV in the RRP before it  
419 fuses spontaneously. Despite the strong reduction in the RRP caused by loss of synapses in Raptor-KO  
420 neurons, the mEPSC frequency was not decreased (Con:  $5.77 \pm 0.82$  Hz, Rap-KO:  $6.15 \pm 0.87$  Hz,  $p = 0.82$ ;  
421 Figure 6A<sub>1,2</sub>). However, the SRR was significantly increased in Raptor-KO neurons (Con:  $0.942 \pm 0.18E-3$  s<sup>-1</sup>  
422 <sup>1</sup>, Rap-KO:  $1.751 \pm 0.31E-3$  s<sup>-1</sup>,  $p = 0.01$ ; Figure 6A<sub>3</sub>), corresponding to mean dwell times of 1062 s and  
423 571 s per SV in Raptor-Con and Raptor-KO neurons, respectively. In Rictor-KO neurons, the mEPSC  
424 frequency was decreased relative to Rictor-Con neurons (Con:  $3.61 \pm 0.89$  Hz, Ric-KO:  $2.11 \pm 0.50$  Hz,  $p =$   
425  $0.012$ ; Figure 6B<sub>1,2</sub>), but, because of the decrease in the RRP, the SRR was unchanged (Con:  $1.14 \pm 0.21E-$   
426  $3$  s<sup>-1</sup>, Ric-KO:  $0.79 \pm 0.13E-3$  s<sup>-1</sup>,  $p = 0.15$ ; Figure 6B<sub>3</sub>).

427           Next, we wanted to assess the effect of mTOR inactivation on spontaneous release rates under  
428 conditions in which the SRR is elevated. To do this, we stimulated neurons at 10 Hz and then measured  
429 spontaneous release in the 10 seconds following the AP train. Compared to baseline spontaneous  
430 release, 10 Hz stimulation caused an increase in spontaneous SV fusion in the 10 seconds following the  
431 end of the train in all groups tested (compare Figure 6A<sub>3</sub> and B<sub>3</sub> to Figure 6C<sub>2</sub> and 6D<sub>2</sub>). Importantly, the

432 mean SRR of Raptor-KO neurons after 10 Hz trains was still higher than that of Raptor-Con neurons (Con:  
 433  $2.24 \pm 0.086E-3 \text{ s}^{-1}$ , Rap-KO:  $5.09 \pm 1.07E-3 \text{ s}^{-1}$ ,  $p = 0.001$ ; Figure 6C<sub>1,2</sub>), whereas the SRR following 10 Hz  
 434 trains in Rictor-KO neurons was not significantly different from that of Rictor-Con neurons (Con:  $2.64 \pm$   
 435  $0.56E-3 \text{ s}^{-1}$ , Ric-KO:  $1.61 \pm 0.33E-3 \text{ s}^{-1}$ ,  $p = 0.096$ ; Figure 6D<sub>1,2</sub>). Taken together, these data indicate that,  
 436 although mTORC1 inactivation reduces the RRP size, the mEPSC frequency is maintained due to an  
 437 increased rate of spontaneous SV release.

Figure 6

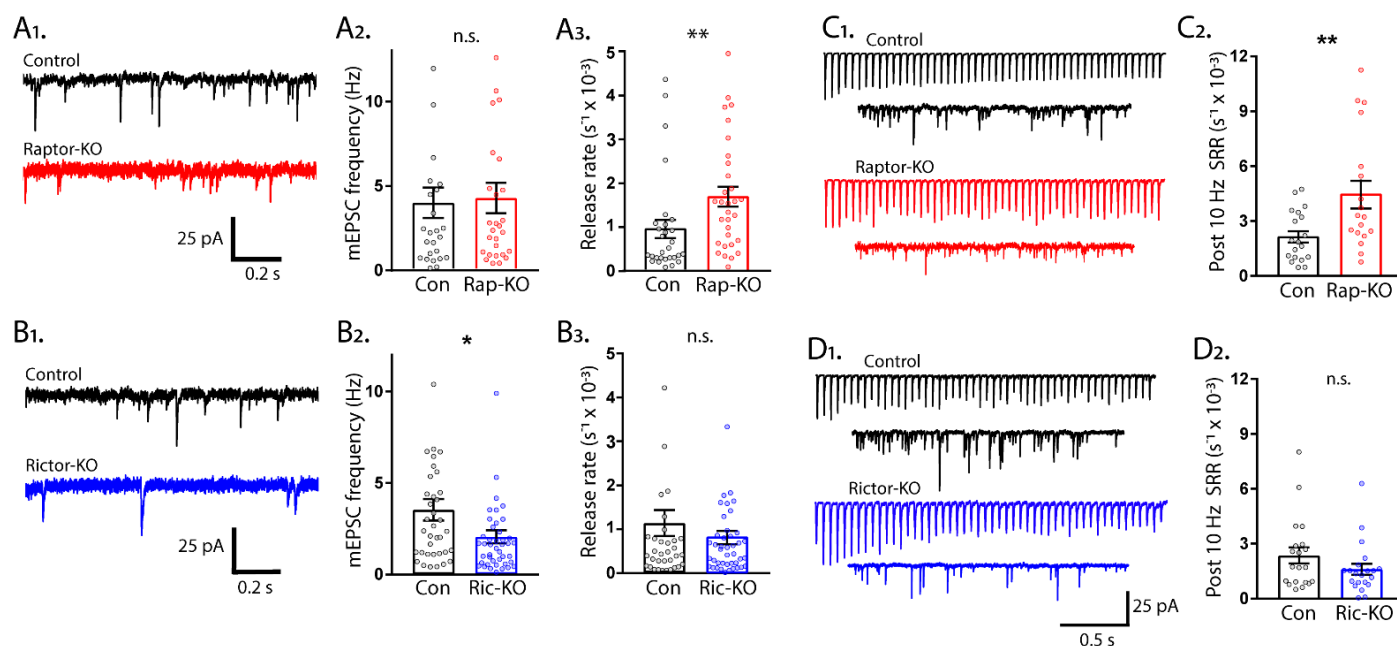

438  
 439 **Figure 6. The rate constant for spontaneous vesicle fusion is regulated by mTORC1 activity.** A<sub>1</sub>. Example  
 440 traces of miniature synaptic currents recorded in single-neuron cultures of Raptor-Con (black) and Raptor-KO (red)  
 441 neurons. A<sub>2</sub>. Plot showing the mEPSC frequencies from Raptor-Con (black) and Raptor-KO (red) neurons. A<sub>3</sub>. Plot  
 442 showing the spontaneous release rate (SRR) of Raptor-Con (black) and Raptor-KO (red) neurons. B<sub>1</sub>. Example traces  
 443 of miniature synaptic currents recorded in single-neuron cultures of Rictor-Con (black) and Rictor-KO (blue)  
 444 neurons. B<sub>2</sub>. Plot showing the mEPSC frequencies from Rictor-Con (black) and Rictor-KO (blue) neurons. B<sub>3</sub>. Plot  
 445 showing the spontaneous release rate (SRR) of Rictor-Con (black) and Rictor-KO (blue) neurons. C<sub>1</sub>. Example traces  
 446 of EPSCs in response to 50 stimulations at 10 Hz (top traces) over traces of spontaneous SV release in the 10 s



447 following the train. Example trace from a Raptor-Con neuron is in black, and a Raptor-KO neuron in red. C<sub>2</sub>. Plot  
448 showing the rate constants for spontaneous SV release of Raptor-Con (black) and Raptor-KO (red) neurons in the  
449 10 s following the 10 Hz stimulation. D<sub>1</sub>. Example traces of EPSCs in response to 50 stimulations at 10 Hz (top  
450 traces) over traces of spontaneous SV release in the 10 s following the train. Example trace from a Rictor-Con  
451 neuron is in black, and a Rictor-KO neuron in blue. D<sub>2</sub>. Plot showing the rate constants for spontaneous SV release  
452 of Rictor-Con (black) and Rictor-KO (blue) neurons in the 10 s following the 10 Hz stimulation. In the dot plots, each  
453 dot represents the value from one neuron, and the bars show the estimated marginal means and s.e.m. \* =  $p <$   
454 0.05, \*\* =  $p < 0.01$ , and n.s. =  $p > 0.05$ , as tested with Generalized Estimating Equations.

455

456 Finally, we wanted to ensure that the regulation of SRR by mTORC1 was not unique to the  
457 single-neuron culture preparation, but quantification of the SRR in this manner is not possible in mass  
458 cultures or brain slice preparations. Instead, we measured mEPSC frequencies after treatment of the  
459 neurons with the mTOR inhibitor rapamycin at a time point (12 h) and concentration (20 nM) at which  
460 there should be no change in the number of vesicles in the RRP (Weston, Chen, & Swann, 2012). Under  
461 these assumptions, changes in mEPSC frequency should reflect changes in the SRR due to mTORC1  
462 activity. After 12 h rapamycin treatment, the mEPSC frequency increased from  $4.19 \pm 0.60$  Hz, in control,  
463 to  $6.56 \pm 0.94$  Hz ( $p = 0.016$ , data not shown), a shift similar in magnitude to the one caused by *Raptor*  
464 deletion, indicating that mTORC1 inhibition increases the rate of spontaneous SV release, regardless of  
465 neuron culture conditions.

Figure S1

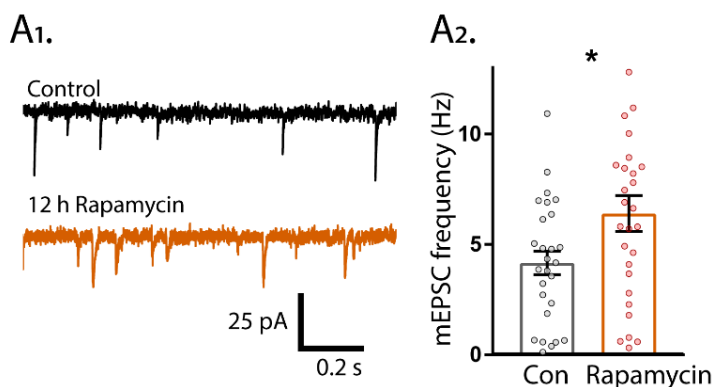

Figure S1. 12 h Rapamycin treatment

increases mEPSCs. A<sub>1</sub>. Example traces of mEPSC

activity recorded in mass cultures after 12 h  
treatment with DMSO (black trace) or 20 nM  
rapamycin (orange trace). A<sub>2</sub>. Summary data  
showing the increase in mEPSC frequency.



472 **mTORC1 and mTORC2 oppositely regulate asynchronous SV fusion.**

473           The rates of SV fusion vary over a range of several orders of magnitude, from approximately  
474  $0.001 \text{ s}^{-1}$  at resting  $[\text{Ca}^{2+}]_i$  for spontaneous release to approximately  $20 \text{ s}^{-1}$  during AP-evoked transmitter  
475 release at several micromolar of  $[\text{Ca}^{2+}]_i$  (Sakaba & Neher, 2001; Schneggenburger & Neher, 2000;  
476 Sudhof, 2012). The data thus far indicate that mTORC1 and mTORC2 regulate the lowest (spontaneous)  
477 and highest (AP-evoked) SV fusion rates, respectively. Thus, we next tested how mTORC1 and mTORC2  
478 inactivation affect SV release under conditions in which rate constants are expected to be between  
479 these two extremes, asynchronous SV release after a single stimulus and asynchronous fusion during  
480 repetitive stimulation, and upon sucrose-evoked fusion, which is calcium-independent.

481           Asynchronous SV release after a single stimulus in hippocampal neurons accounts for a low  
482 percentage of the total transmitter release, but may play important roles in neurotransmission (Kaesler  
483 & Regehr, 2014). To quantify the rate constant of asynchronous release, we subtracted the fast  
484 component of evoked release from the total EPSC charge and normalized it by the total RRP charge. Like  
485 the SRR, Raptor-KO neurons also showed an increase in the rate of asynchronous SV fusion relative to  
486 that of Raptor-Con neurons (Con:  $0.070 \pm 0.011 \text{ s}^{-1}$ , Rap-KO:  $0.122 \pm 0.018 \text{ s}^{-1}$ ,  $p = 0.002$ ; Figure 7A<sub>1,2</sub>). In  
487 contrast to Raptor-KO neurons, but similar to the effect of *Rictor* loss on the peak evoked SV fusion rate,  
488 Rictor-KO neurons showed a decrease in the asynchronous SV fusion rate relative to that of Rictor-Con  
489 neurons (Con:  $0.096 \pm 0.017 \text{ s}^{-1}$ , Ric-KO:  $0.047 \pm 0.009 \text{ s}^{-1}$ ,  $p = 0.018$ ; Figure 7B<sub>1,2</sub>).

490           Asynchronous release during high frequency stimulation can reach high rates of SV fusion,  
491 second only to synchronous evoked release. To quantify the asynchronous release rate during 10 Hz  
492 stimulation, we subtracted the fast component of evoked release from the total evoked EPSC of the last  
493 stimulation of 50 at 10 Hz and normalized this rate by the estimated remaining RRP charge. In this mode  
494 of SV release, Raptor-KO neurons did not show an elevated rate of fusion (Con:  $1.15 \pm 0.32 \text{ s}^{-1}$ , Rap-KO:  
495  $1.23 \pm 0.32 \text{ s}^{-1}$ ,  $p = 0.87$ ; Figure 7C<sub>1,2</sub>), but Rictor-KO neurons did show a significantly lower rate of fusion

496 (Con:  $2.21 \pm 0.48 \text{ s}^{-1}$ , Ric-KO:  $1.19 \pm 0.24 \text{ s}^{-1}$ ,  $p = 0.037$ ; Figure 7D<sub>1,2</sub>), relative to those of their respective  
 497 controls.

Figure 7

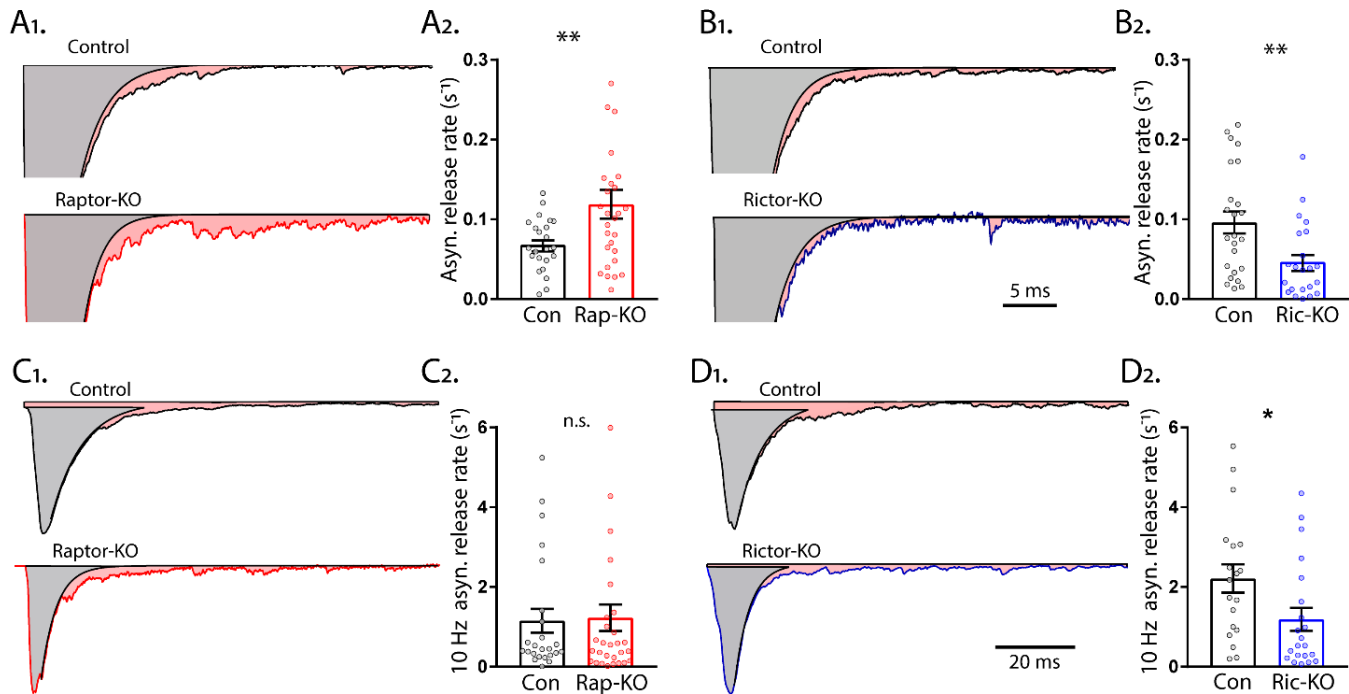

498 **Figure 7. mTORC1 and mTORC2 inactivation have opposite effects on asynchronous synaptic vesicle**  
 499 **release.** A<sub>1</sub>. Example traces of normalized EPSCs evoked at 0.1 Hz from Raptor-Con (black) and Raptor-KO (red)  
 500 neurons. The gray shaded area represents the area under the curve of the synchronous component of synaptic  
 501 vesicle (SV) release, and the pink shaded area represents the asynchronous component. A<sub>2</sub>. Plot showing the rate  
 502 constants for asynchronous SV release of Raptor-Con (black) and Raptor-KO (red) neurons. B<sub>1</sub>. Example traces of  
 503 normalized EPSCs evoked at 0.1 Hz from Rictor-Con (black) and Rictor-KO (blue) neurons shaded to highlight the  
 504 synchronous (gray) and asynchronous (pink) components of SV release. B<sub>2</sub>. Plot showing the rate constants for  
 505 asynchronous SV release of Rictor-Con (black) and Rictor-KO (blue) neurons. C<sub>1</sub>. Example traces of normalized  
 506 EPSCs at the end of a 10 Hz train from Raptor-Con (black) and Raptor-KO (red) neurons. The gray shaded area  
 507 represents the area under the curve of the synchronous component of SV release and the pink shaded area  
 508 represents the asynchronous component. C<sub>2</sub>. Plot showing the rate constants for asynchronous SV release at the  
 509 end of a 10 Hz train from Raptor-Con (black) and Raptor-KO (red) neurons. D<sub>1</sub>. Example traces of normalized EPSCs

510 at the end of a 10 Hz train from Rictor-Con (black) and Rictor-KO (blue) neurons shaded to highlight the  
511 synchronous (gray) and asynchronous (pink) components of SV release. D<sub>2</sub>. Plot showing the rate constants for  
512 asynchronous SV release at the end of a 10 Hz train from Rictor-Con (black) and Rictor-KO (blue) neurons. In the  
513 dot plots, each dot represents the mean value from one neuron, and the bars show the estimated marginal means  
514 and s.e.m. \* =  $p < 0.05$ , \*\* =  $p < 0.01$ , and n.s. =  $p > 0.05$ , as tested with Generalized Estimating Equations.

515

516 To determine whether mTORC inactivation affects release rates in a mode of SV release that is  
517 calcium-independent, we analyzed the kinetics of the sucrose response to quantify the peak rate of SV  
518 release in response to 500 mM sucrose application, which is thought to reflect the calcium-independent  
519 energy barrier for SV fusion (Basu, Betz, Brose, & Rosenmund, 2007). This was done by integrating the  
520 responses to sucrose for each neuron, converting it to vesicle number and normalizing it to its  
521 corresponding RRP, and then finding the maximal slope as a measure for peak release rate (Basu et al.,  
522 2007). We found that the peak release rate constant induced by sucrose was not different between  
523 Raptor-Con and Raptor-KO neurons (Con:  $1.54 \pm 0.07 \text{ s}^{-1}$ , Rap-KO:  $1.50 \pm 0.06 \text{ s}^{-1}$ ,  $p = 0.76$ ; Figure 8A<sub>1,2</sub>),  
524 or Rictor-Con and Rictor-KO neurons (Con:  $1.48 \pm 0.15 \text{ s}^{-1}$ , Ric-KO:  $1.5 \pm 0.17 \text{ s}^{-1}$ ,  $p = 0.76$ ; Figure 8B<sub>1,2</sub>),  
525 indicating that the alteration in SV release caused by mTORC1 and mTORC2 inactivation are not due to  
526 alterations in the energy barrier for SV fusion, but instead they are due to alterations in the calcium  
527 sensitivity of the release process.

528 Next, because the rate of SV replenishment has been shown to be a critical determinant of  
529 asynchronous release (Otsu et al., 2004), we measured the rate at which SVs were replenished following  
530 the sucrose-induced depletion by analyzing the steady-state component of the current response.  
531 Surprisingly, the rate constant for vesicle replenishment was significantly increased in Raptor-KO  
532 neurons compared with that of Raptor-Con neurons (Con:  $0.103 \pm 0.010 \text{ s}^{-1}$ , Rap-KO:  $0.179 \pm 0.017 \text{ s}^{-1}$ ,  $p$   
533  $< 0.001$ ; Figure 8A<sub>1</sub> and 8A<sub>3</sub>), while Rictor-KO did not alter the rate of vesicle replenishment (Con:  $0.091$   
534  $\pm 0.013 \text{ s}^{-1}$ , Ric-KO:  $0.117 \pm 0.017 \text{ s}^{-1}$ ,  $p < 0.32$ ; Figure 8B<sub>1</sub> and 8B<sub>3</sub>).

535 Finally, to summarize the effects of mTORC1 and mTORC2 inactivation on SV release rates over  
 536 the range of conditions tested, we plotted the relative changes in rate constants for each of the  
 537 conditions from lowest to highest rates, plus sucrose (Figure 8C). Taken together, the data indicate that  
 538 mTORC1 inhibition elevates rate constants for SV fusion under conditions in which the rate is relatively  
 539 low, but does not affect the rate of fusion when it is high. In contrast, mTORC2 inhibition impairs SV  
 540 fusion over a wider range of rates, but the effect is more pronounced when rates of SV fusion are high.

Figure 8

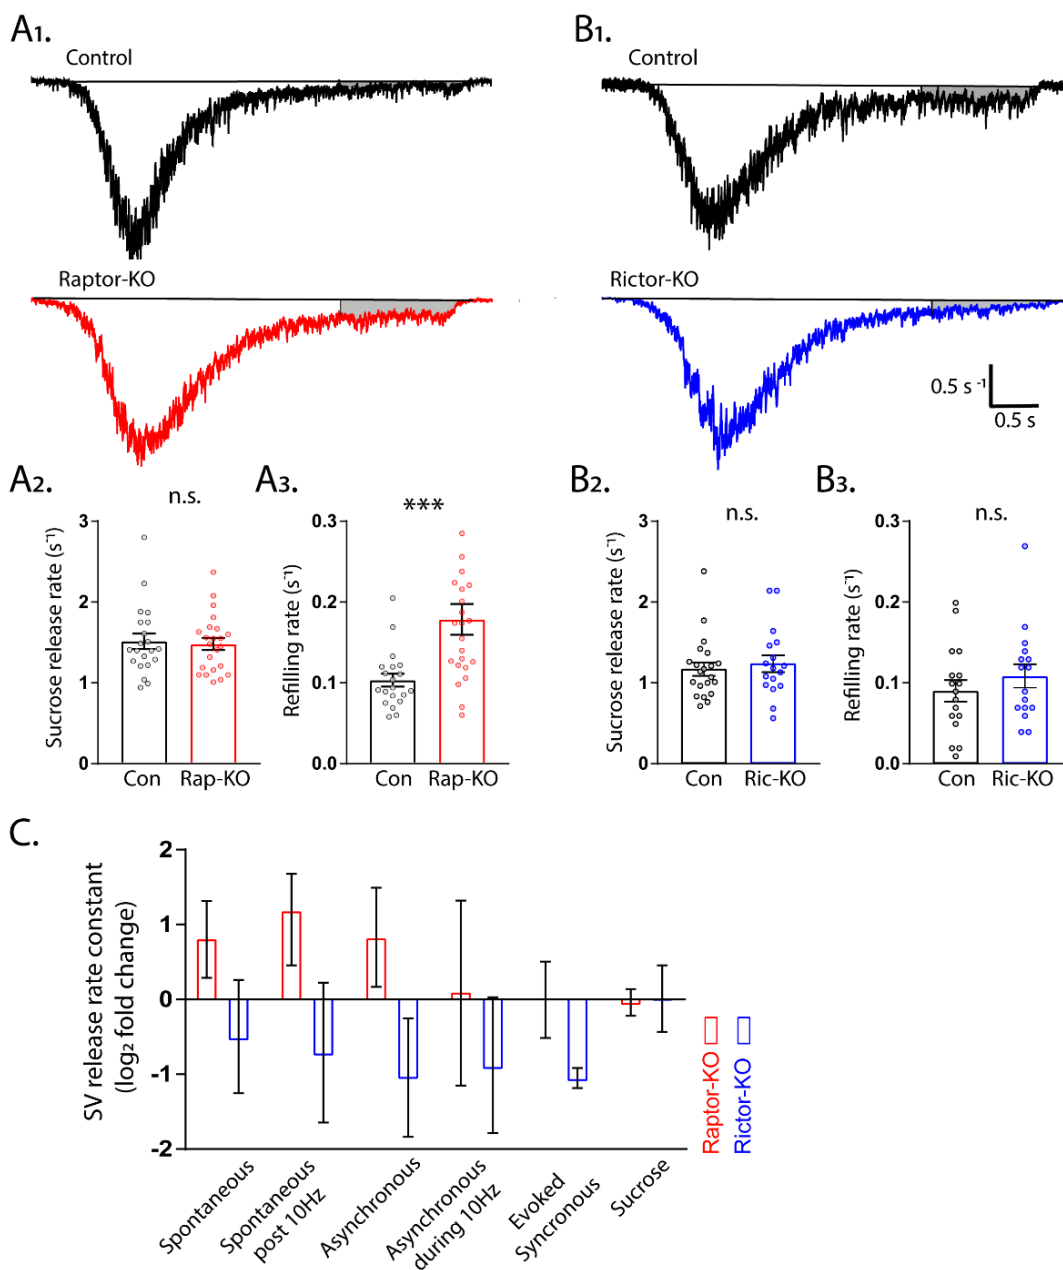

541 **Figure 8. mTOR inactivation does not affect sucrose-induced SV release rates.** A<sub>1</sub>. Example traces of  
542 normalized current responses to 500 mM sucrose application in Raptor-Con (black) and Raptor-KO (red) neurons.  
543 The black line shows the pre-sucrose baseline, and the gray shaded area shows the area used to calculate the  
544 refilling rate. A<sub>2</sub>. Plot showing the rate constants for sucrose-induced synaptic vesicle (SV) release in Raptor-Con  
545 (black) and Raptor-KO (red) neurons. A<sub>3</sub>. Plot showing the refilling rate constants after sucrose-induced SV release  
546 in Raptor-Con (black) and Raptor-KO (red) neurons. B<sub>1</sub>. Example traces of normalized current responses to 500 mM  
547 sucrose application in Rictor-Con (black) and Rictor-KO (blue) neurons. The black line shows the pre-sucrose  
548 baseline, and the gray shaded area shows the area used to calculate the refilling rate. B<sub>2</sub>. Plot showing the rate  
549 constants for sucrose-induced SV release in Rictor-Con (black) and Rictor-KO (blue) neurons. B<sub>3</sub>. Plot showing the  
550 refilling rate constants after sucrose-induced SV release in Rictor-Con (black) and Rictor-KO (blue) neurons. C. Plot  
551 showing the release rate constants for both Raptor-KO (red) and Rictor-KO (blue) neurons over the range of  
552 conditions tested in the study. Each bar represents the mean log<sub>2</sub> fold change for that genotype to illustrate the  
553 relatively stronger effect of mTORC1 inactivation in potentiating SV release when the rate is low, and of mTORC2  
554 inactivation when the rate is high. Error bars are 95% Confidence Intervals. \*\*\* =  $p < 0.001$ , and n.s. =  $p > 0.05$ , as  
555 tested with Generalized Estimating Equations.

556

557

558

559

560

561

562

563

564

565

566 **Discussion**

567 Both the mTORC1 and mTORC2 complexes have been shown to regulate important processes  
568 such as learning and memory, the response to drugs of abuse, and the development of epilepsy and  
569 autism via changes in synaptic strength (Graber, McCamphill, & Sossin, 2013; Hou & Klann, 2004; Huang  
570 et al., 2013; Mazei-Robison et al., 2011; Stoica et al., 2011; S. J. Tang et al., 2002). However, the  
571 mechanisms underlying the complex-specific changes in synaptic function are largely unknown. Using  
572 genetic mouse models to specifically inactivate mTORC1 or mTORC2, and neuronal culture systems to  
573 isolate effects, we show here that both complexes are necessary to support normal neuron growth.  
574 Previous studies investigating the specific roles of mTORC1 versus mTORC2 in neurons found that  
575 inhibiting either complex via shRNA knockdown of *Raptor* or *Rictor* mRNA in hippocampal neurons  
576 (Urbanska et al., 2012), or genetic deletion of *Raptor* or *Rictor* in Purkinje neurons (Angliker et al., 2015;  
577 Thomanetz et al., 2013), reduced somatic and dendritic growth. In agreement with these studies, we  
578 found reductions in neuronal soma size and dendritic length (Figure 1), and corresponding changes in  
579 passive membrane properties (Table 1), in both Raptor-KO and Rictor-KO neurons, verifying the general  
580 role of both mTORC1 and mTORC2 as regulators of neuron growth.

581 Because of the high level of crosstalk between the two mTOR-containing complexes (Xie &  
582 Proud, 2014), and because of their similar effects on gross neuronal morphology, it is somewhat  
583 surprising that their effects on synaptic transmission are non-overlapping and, in some cases, opposite  
584 (Figures 7A and 7B). Although inactivation of either complex strongly reduced eEPSC amplitude, we  
585 found that the physiological mechanisms underlying these reductions were different, with mTORC1  
586 inhibition reducing eEPSC size via postsynaptic mechanisms and mTORC2 inactivation reducing it  
587 through presynaptic mechanisms. Furthermore, we found that mTORC1 inhibition simultaneously  
588 increased spontaneous and asynchronous SV release, whereas mTORC2 inhibition decreased evoked  
589 and asynchronous SV release. Thus, the roles of mTORC1 and mTORC2 in regulating synaptic

590 transmission are non-overlapping and dissociable from their more general control of neuron growth.  
591 Previous studies have shown that synaptic plasticity changes caused by mTOR hyperactivation (PTEN  
592 loss) precede large-scale morphological changes (Sperow et al., 2012; Takeuchi et al., 2013), supporting  
593 the idea that synaptic transmission and neuron morphology are independently regulated by mTOR.

594 Raptor-KO decreased evoked glutamatergic synaptic transmission (Figure 2), and postsynaptic  
595 Raptor-KO was sufficient to cause this decrease (Figure 5). Furthermore, reductions in both the mEPSC  
596 amplitude and number of synapses accompanied this decrease (Figure 2). Previous studies showed that  
597 mTOR inhibition by rapamycin treatment reduces the number of AMPA receptors at the synapse (Wang  
598 et al., 2006), the number of synapses (Weston et al., 2012), and the number of SVs per synapse  
599 (Hernandez et al., 2012). Accordingly, mTOR hyperactivation increases mEPSC amplitude (Xiong, Oviedo,  
600 Trotman, & Zador, 2012), AMPA receptor number, and spine density (G. Tang et al., 2014; Williams,  
601 DeSpensa, Li, Gullledge, & Luikart, 2015), and these effects are blocked by rapamycin. Thus, integrating  
602 our findings on specific mTORC1 inactivation with these previous findings, several lines of evidence now  
603 indicate that mTORC1 acts via a postsynaptic mechanism to bidirectionally regulate evoked  
604 glutamatergic synaptic strength. In contrast to mTORC1 inactivation, mTORC2 inactivation affected  
605 presynaptic parameters including  $P_{vr}$ , peak evoked SV release rate, and paired pulse ratios, suggesting  
606 that the major mechanism through which mTORC2 inactivation reduces eEPSC strength is by impairing  
607 presynaptic function. Although neurophysiological deficits have been previously reported in Rictor-KO  
608 animals, presynaptic function was not specifically assessed (Dadalko et al., 2015; Huang et al., 2013;  
609 Thomanetz et al., 2013; Zhu, Chen, Mays, Stoica, & Costa-Mattioli, 2018). Thus, our data establish  
610 mTORC2 as a potent regulator of presynaptic function and suggest that at least some of the previously  
611 reported effects of Rictor loss on synaptic transmission are due to presynaptic deficits.

612 The different effects following mTORC1 and mTORC2 inactivation on post- and presynaptic  
613 function leads to the question of what downstream targets of each complex mediate these changes. Of

614 the molecules downstream of mTORC1, 4E-BP, which is inhibited by active mTORC1, is most strongly  
615 linked to regulation of synaptic function. In particular, 4E-BP regulates synaptic transmission via its  
616 translational repression of the AMPA receptor subunits GluA1 and GluA2 (Ran et al., 2013), and  
617 postsynaptic 4E-BP has been shown to play a role in retrograde or trans-synaptic regulation of  
618 presynaptic release (Kauwe et al., 2016); thus, the effects of Raptor loss could reflect a combination of  
619 these effects. Regarding the presynaptic effects of mTORC2, Akt and PKC isoforms are the most well  
620 studied substrates. Although Akt has been suggested to play a role in SV endocytosis (Smillie & Cousin,  
621 2012), multiple PKC isoforms are targets of mTORC2 (Ikenoue, Inoki, Yang, Zhou, & Guan, 2008), and  
622 these isoforms are known to influence the RRP, PPRs, asynchronous release, and post-tetanic-  
623 potentiation via presynaptic mechanisms (Chang & Mennerick, 2010; Chu, Fioravante, Leitges, & Regehr,  
624 2014; Hori, Takai, & Takahashi, 1999; Xu, Liu, & Alkon, 2014). More specifically, PKC has been shown to  
625 regulate the activity of key presynaptic molecules such as Munc-18 (Barclay et al., 2003; Fujita et al.,  
626 1996) and Munc-13 (Hori et al., 1999), as well as the actin cytoskeleton (Angliker & Ruegg, 2013).  
627 Therefore, the effects of Rictor loss on presynaptic neurotransmission may be caused by lack of PKC  
628 activity in these neurons.

629         Although mTORC1 inactivation decreased evoked strength via postsynaptic mechanisms, it  
630 increased the rate of spontaneous and asynchronous release. Because these release rate constants  
631 reflect the likelihood of an individual SV to fuse in a given circumstance, they likely reflect a change in  
632 the presynaptic terminal. An open question, however, is whether it is reduced mTORC1 activity in the  
633 presynapse that causes this change, or whether mTORC1 inactivation in the postsynapse provides a  
634 retrograde signal to the presynaptic terminal to alter SV release. In *Drosophila*, 4eBP translationally  
635 represses the synaptic protein Complexin to regulate neurotransmitter release at the presynapse  
636 (Mahoney, Azpurua, & Eaton, 2016), however, it is not known if this mechanism is conserved, or if it  
637 occurs downstream of the mTOR pathway, in mammals. Another mTORC1 target, SREBP1, regulates



638 cholesterol biosynthesis, and cholesterol depletion has been shown to decrease evoked  
639 neurotransmission and enhance spontaneous transmission (Wasser et al., 2007), suggesting that this  
640 pathway may mediate the effects on presynaptic release in Raptor-KO neurons. However, as mentioned  
641 above, there is evidence that postsynaptic mTOR can signal retrogradely to enhance the RRP and  
642 presynaptic release in response to a reduction in postsynaptic glutamate receptor activity (Henry et al.,  
643 2012; Henry et al., 2018; Penney et al., 2012), providing proof of principle that mTOR can signal across  
644 the synapse. In these studies, mTORC1 *activation* signals to increase the RRP, whereas we found that  
645 mTORC1 *inactivation* decreases the RRP, and concomitantly increases the spontaneous and  
646 asynchronous SV fusion rates. It is possible that mTORC1 regulates additional trans-synaptic signals that  
647 regulate spontaneous and asynchronous release, or that the effect on these release modes is merely  
648 compensatory downstream of the reduced evoked transmission, but we think the latter scenario is  
649 unlikely because 12 h rapamycin treatment increased spontaneous release, but does not reduce evoked  
650 release or synapse number (Weston et al., 2012). Thus, future studies must establish the pre- or  
651 postsynaptic locus of the effect of mTORC1 activity on SV release.

652         One caveat to our findings is that we used the RRP as defined by application of hypertonic  
653 sucrose to calculate the rate constants for spontaneous and asynchronous SV fusion. Our analysis  
654 assumes that evoked, spontaneous, and asynchronous release all draw from this pool of vesicles.  
655 Although there is good evidence to support this assumption (Ryan, Reuter, & Smith, 1997;  
656 Schneggenburger & Rosenmund, 2015), it is possible that molecularly distinct SV pools are not all  
657 released by sucrose application (Chamberland & Toth, 2016; Fredj & Burrone, 2009; Sara, Virmani, Deak,  
658 Liu, & Kavalali, 2005). If true, this may change our specific conclusion that the rate constant of SV fusion  
659 changes to the conclusion that the vesicle pools that support evoked, spontaneous, and asynchronous  
660 release are differentially affected by the reduction in synapse number caused by Raptor loss. Thus,  
661 although our data cannot conclusively distinguish between these two possibilities, the finding that

662 mTORC1 inactivation enhances asynchronous release after a single stimulation but not after 10 Hz  
663 stimulation suggests that it is the SV fusion rate that is affected. We speculate that the differential  
664 regulation of SV release modes is due to either the alteration of the sensitivity of SV fusion to calcium  
665 (Nosyreva & Kavalali, 2010), or an alteration in the influx of calcium under different conditions, which  
666 has been shown to differentially regulate spontaneous and evoked release in response to loss of  
667 Presenilin 1 (Pratt, Zhu, Watari, Cook, & Sullivan, 2011). The fact that we found no changes in the  
668 sucrose-evoked SV release rate (Figure 8), which is thought to be calcium-independent (Rosenmund &  
669 Stevens, 1996), supports the idea that the changes we found are calcium-dependent.

670         Several recent studies have highlighted instances in which spontaneous and evoked release are  
671 independently modified (Ramirez & Kavalali, 2011). It is noteworthy that these examples include  
672 blockade of IGF-1 receptors (Gazit et al., 2016), inhibition of protein synthesis (Scarnati et al., 2018), and  
673 reduction of cholesterol levels in neurons (Wasser et al., 2007; Zamir & Charlton, 2006), as these are all  
674 factors that either feed into mTORC1 activity or are modulated by mTORC1 (Peterson et al., 2011;  
675 Saxton & Sabatini, 2017). Because mTORC1 is considered a “hub” that integrates multiple extra- and  
676 intracellular cues to control anabolism in cells (J. Kim & Guan, 2019), it is uniquely positioned to  
677 coordinate a synaptic response to metabolic changes. Our findings add to a growing body of literature  
678 demonstrating that the metabolic state of neurons can signal to synapses to adjust the balance of  
679 spontaneous and evoked release (Gazit et al., 2016; Scarnati et al., 2018), and identify a novel role for  
680 the mTOR signaling network in maintaining this balance. Furthermore, our data broaden the idea of  
681 differential regulation of evoked versus spontaneous release by showing that asynchronous release is  
682 also affected. Thus, metabolic changes are not mediating a “competition” or specific ratio between  
683 spontaneous and evoked SV release, but instead inducing a shift in the way that synapses respond to  
684 different levels of activity, including inactivity.

685 Variants in at least 10 genes in the mTOR signaling network, including *MTOR*, are known to  
686 cause epilepsy, autism, and intellectual disability. Although all of these variants are believed to increase  
687 signaling through mTORC1, some have been shown to increase mTORC2 signaling (e.g. *PTEN*, *PIK3CA*,  
688 and *MTOR*), whereas others decrease mTORC2 signaling (e.g. *TSC1*, *TSC2*, and *DEPDC5*). Our data suggest  
689 that differential activity levels of the two complexes in disease states would lead to distinct synaptic  
690 alterations. Accordingly, previous studies have shown that *Pten* loss and *Tsc1* loss cause different  
691 synaptic alterations (Bateup et al., 2013; Chamberland & Toth, 2016; Williams et al., 2015). Together,  
692 these data suggest that complex specific targeting may be necessary to restore normal synaptic function  
693 in neurological diseases involving mTOR hyperactivation. Moreover, future studies are needed to further  
694 clarify the contributions of each mTOR complex to these neurological diseases.

695

## 696 **Materials and Methods**

### 697 **Mice and cell culture**

698 Animal housing and use were in compliance with the National Institutes of Health (NIH)  
699 Guidelines for the Care and Use of Laboratory Animals and were approved by the Institutional Animal  
700 Care and Use Committee at the University of Vermont. Experiments used B6.Cg-*Rptor*<sup>tm1.1Dmsa</sup>/J mice  
701 that possess loxP sites on either side of exon 6 of the *Raptor* gene (Jackson Labs stock: 013188),  
702 *Rictor*<sup>tm1.1Klg</sup>/SjmJ mice that possess loxP sites on either side of exon 11 of the *Rictor* gene (Jackson Labs  
703 stock: 020649), and *Tsc1*<sup>tm1Djk</sup>/J mice that possess loxP sites around exons 17 and 18 of the *Tsc1* gene  
704 (Jackson Labs stock: 005680). All three lines were maintained as homozygous for the floxed allele.  
705 Experiments that involved treatment of wild-type neuronal cultures with drugs used C57BL/6J mice  
706 (Jackson Labs stock: 000664).

707 Conventional and single-neuron primary cultures were grown on astrocytes derived from wild-  
708 type C57BL/6J mice (Jackson Labs stock: 000664). Cortices were dissected from postnatal day 0-1 (P0-

709 P1) mice of either sex and placed in 0.05% trypsin-EDTA (Gibco) for 15 min at 37°C in a Thermomixer  
710 (Eppendorf) with gentle agitation (800 rpm). Then, the cortices were mechanically dissociated with a 1  
711 mL pipette tip and the cells were plated into T-75 flasks containing astrocyte media [DMEM media  
712 supplemented with glutamine (Gibco) and MITO+ Serum Extender (Corning). After the astrocytes  
713 reached confluency, they were washed with PBS (Gibco) and incubated for 5 min in 0.05% trypsin-EDTA  
714 at 37°C, and then resuspended in astrocyte media. For conventional cultures, the astrocytes were added  
715 to 6-well plates containing 25-mm coverslips precoated with coating mixture [0.7 mg/ml collagen I  
716 (Corning) and 0.1 mg/ml poly-D-lysine (Sigma) in 10 mM acetic acid]. For single-neuron cultures, the  
717 astrocytes were added to 6-well plates containing 25-mm agarose-coated coverslips stamped with  
718 coating mixture using a custom-built stamp to achieve uniformly sized, astrocyte microislands (200- $\mu$ m  
719 diameter).

720 For the primary neuron culture, the hippocampi from P0-P1 mice of both sexes were dissected  
721 in cold HBSS (Gibco). The hippocampi were then digested with papain (Worthington) for 60-75 min and  
722 treated with inactivating solution (Worthington) for 10 min, both while shaking at 800 rpm at 37°C in a  
723 Thermomixer. The neurons were then mechanically dissociated and counted. For single-neuron cultures,  
724 2000-3000 neurons/well were added to 6-well plates in NBA plus [Neurobasal-A medium (Gibco)  
725 supplemented with Glutamax (Gibco) and B27 (Invitrogen)], each well containing a 25-mm coverslip  
726 with astrocyte microislands. For conventional cultures, 150,000 neurons/well were added to 6-well  
727 plates in NBA plus, each well containing a 25-mm coverslip with a confluent layer of astrocytes. After  
728 plating, approximately  $4 \times 10^{10}$  genome copies (GC) of either AAV8-hsyn-mCherry-Cre or AAV8-hsyn-  
729 mCherry virus (UNC Vector Core) was added to each well. For the treatment of WT neurons with  
730 rapamycin experiment, rapamycin (Cayman Chemical) was dissolved in DMSO at a concentration of 20  
731  $\mu$ M and then added to cell culture media at a 1:1000 dilution for 12-16 hr prior to electrophysiology

732 experiments to achieve a final concentration of 20 nM. Control neurons were treated with an equal  
733 amount of DMSO alone.

734 For experiments using paired recording and optogenetic excitation, the neuron suspensions  
735 after hippocampal dissociation were split into three tubes of 300  $\mu$ l each. To one of these tubes,  $6 \times 10^{10}$   
736 GC of AAV8-hsyn-mCherry-Cre was added, and to another,  $6 \times 10^{10}$  GC of AAV9-Syn-Chronos-  
737 GFP(Klapoetke et al., 2014) was added. The virus was left on for 3 hr while the neuron suspensions were  
738 gently shaken (500 rpm) at 37°C in a Thermomixer. After 3 hr, the neurons were centrifuged three times  
739 at 1500 rpm for 5 min on a benchtop centrifuge and resuspended in fresh Neurobasal-A medium each  
740 time. After the third resuspension, the neurons were counted. From each of the three tubes, 50,000  
741 neurons were added to each well of a 6-well plate containing NBA plus to generate a network containing  
742 Control, Cre-expressing, and Chronos-expressing neurons in non-overlapping neuronal population.

#### 743 **Immunocytochemistry**

744 Neurons were rinsed three times with PBS, fixed with 4% PFA for 30 min, and then washed with  
745 PBS three times. Neurons were then placed in blocking solution (10% NGS, 0.1% Triton X-100, and PBS)  
746 at room temperature for 1 hr. The following primary antibodies in blocking solution were then applied  
747 to the neurons at 4°C overnight: MAP2 (mouse monoclonal, 1:1000 dilution, Synaptic Systems, Cat# 188  
748 011, RRID:AB\_2147096), phospho-S6 Ribosomal Protein Ser240/244 (rabbit monoclonal, 1:1000 dilution,  
749 Cell Signaling Technology, Cat# 5364, RRID:AB\_10694233), phospho-AKT Ser473 (rabbit monoclonal,  
750 1:1000 dilution, Cell Signaling Technology, Cat# 4060, RRID:AB\_2315049), and VGLUT1 (rabbit  
751 polyclonal, 1:5000 dilution, Synaptic Systems, Cat # 135 302, RRID:AB\_887877). Following primary  
752 antibody application, cells were washed three times in PBS and then incubated in the following Alexa  
753 Fluor secondary antibodies (Invitrogen/Molecular Probes) for 1 hr at room temperature: goat anti-  
754 mouse 488 (1:1000, Cat # A-11017, RRID:AB\_143160) and goat anti-rabbit 647 (1:1000, Cat# A-21244,

755 RRID:AB\_141663). Cells were then mounted to slides with Prolong Gold Antifade (Life Technologies) and  
756 allowed to cure for 24 hr.

757 Images (1024 × 1024 pixels) for pS6 and pAKT expression analysis were obtained using a  
758 DeltaVision Restoration Microscopy System (Applied Precision/GE Life Sciences) with an inverted  
759 Olympus IX70 microscope with a 20× oil objective, SoftWoRx software, and a CoolSNAP-HQ charge-  
760 coupled device digital camera (Photometrics). Image exposure times and settings were kept the same  
761 between groups in a culture and were optimized to ensure that there were no saturated pixels. Images  
762 were acquired in stacks of 8–12 planes at 0.5 μm depth intervals and then deconvolved. Stacks were  
763 processed using Fiji software (Schindelin et al., 2012) to create maximum intensity projections. Image  
764 background was subtracted using the rolling ball method with a radius of 100 μm. To analyze levels of  
765 mTOR effectors, regions of interest (ROIs) were drawn around the cell body using the MAP2 channel,  
766 and then the mean fluorescence intensity and cell body area were measured for pS6 and pAKT for each  
767 neuron imaged. Because the absolute values of the fluorescence intensity varied between cultures, the  
768 values were normalized to the mean value of the control neurons for each culture.

769 For dendritic length and glutamatergic terminal number analysis, primary neuron cultures on  
770 astrocyte microislands were generated and fixed as described above. Images (1024 x 1024 pixels) were  
771 obtained using a C2 confocal microscopy system (Nikon) with a 40x oil objective. Images were acquired  
772 using equal exposure times between groups in stacks of 4-6 images at 2.0 μm depth intervals. Maximum  
773 intensity projections were created using Fiji software. Total dendritic length was obtained by tracing  
774 MAP2 expression using the NeuronJ plugin (Meijering et al., 2004). VGLUT puncta number was  
775 calculated using Intellicount software (Fantuzzo et al., 2017).

776

777 **Electrophysiology**

778 Whole-cell recordings were performed with patch-clamp amplifiers (MultiClamp 700B amplifier;  
779 Molecular Devices) under the control of Clampex 10.3 or 10.5 (Molecular Devices, pClamp,  
780 RRID:SCR\_011323). Data were acquired at 10 kHz and low-pass filtered at 6 kHz. The series resistance  
781 was compensated at 70%, and only cells with series resistances maintained at less than 15 M $\Omega$  were  
782 analyzed. The pipette resistance was between 2 and 4 M $\Omega$ . Standard extracellular solution contained the  
783 following (in mM): 140 NaCl, 2.4 KCl, 10 HEPES, 10 glucose, 4 MgCl<sub>2</sub>, and 2 CaCl<sub>2</sub> (pH 7.3, 305 mOsm).  
784 Internal solution contained the following: 136 mM K-gluconate, 17.8 mM HEPES, 1 mM EGTA, 0.6 mM  
785 MgCl<sub>2</sub>, 4 mM ATP, 0.3 mM GTP, 12 mM creatine phosphate, and 50 U/ml phosphocreatine kinase. All  
786 experiments were performed at room temperature (22–23°C). Whole-cell recordings were performed  
787 on neurons from control and mutant groups in parallel on the same day (day 12–14 *in vitro*).

788 For voltage-clamp experiments, neurons were held at -70 mV unless noted. Action potential  
789 (AP)-evoked EPSCs were triggered by a 2 ms somatic depolarization to 0 mV. The shape of the evoked  
790 response and the effect of receptor antagonists [3 mM kynurenic acid (KYN, Tocris Bioscience) or 20  $\mu$ M  
791 bicuculline (BIC, Tocris Bioscience)] were analyzed to verify the glutamatergic or GABAergic identities of  
792 the neurons. Neurons were stimulated at 0.2 Hz in standard external solution to measure basal-evoked  
793 synaptic responses. Electrophysiology data were analyzed offline with AxoGraph X software (AxoGraph  
794 Scientific, RRID:SCR\_014284). To determine the number of releasable SVs onto each neuron, we  
795 measured the charge transfer of the transient synaptic current induced by a 5 s application of  
796 hypertonic sucrose solution directly onto the neuron and then divided the sucrose charge by the charge  
797 of the average miniature event onto the same neuron (Rosenmund & Stevens, 1996).

798 For current-clamp experiments, the resting membrane potential was measured and then  
799 current was injected to achieve a resting membrane potential of -70 mV. KYN was applied to block  
800 synaptic responses. Input resistance and membrane time constant were calculated from the steady  
801 state and charging transient, respectively, of voltage responses to 0.5 s, 20 pA hyperpolarizing current

802 steps. Membrane capacitance was calculated by dividing the time constant by the input resistance. AP  
803 were evoked with 0.5 s, 20 pA depolarizing current steps. AP threshold was defined as the membrane  
804 potential at the inflection point of the rising phase of the AP. AP amplitude was defined as the  
805 difference in membrane potential between the AP peak and threshold. The membrane potential values  
806 were not corrected for the liquid junction potential.

807

### 808 **Miniature event detection**

809 Miniature synaptic potentials were recorded for 70–90 s in 500 nM tetrodotoxin (TTX, Enzo Life  
810 Sciences) to block AP-evoked release. Data were filtered at 1 kHz and analyzed using template-based  
811 miniature event detection algorithms implemented in the AxoGraph X. The threshold for detection was  
812 set at three times the baseline SD from a template of 0.5 ms rise time and 3 ms decay. For each neuron,  
813 3 mM KYN was applied as a negative control to detect false positive events. If the frequency of false  
814 positives exceeded 0.25 the frequency of total positives, the neuron was discarded. If rate was lower  
815 than 0.25, the amplitude and frequency of false positives were subtracted from the total to obtain the  
816 rate and frequency of true positives.

817

### 818 **Synaptic vesicle release rate analysis**

819 The rate constant for vesicle fusion ( $k$ ) was calculated for each neuron and each mode of vesicle  
820 release with the first order reaction equation  $r = k [A]$ , where  $r$  = the observed vesicle release rate  
821 (SVs/s) and  $A$  = the number of SVs in the RRP. For spontaneous release, the observed vesicle release rate  
822 was the mEPSC frequency. For the peak rate of evoked SV release, at least 10 EPSCs were collected per  
823 neuron, baselined to the 5 ms period immediately preceding the stimulation, filtered at 1 kHz and  
824 deconvolved with the waveform of the mean mEPSC from that neuron using a custom algorithm  
825 implemented in Axograph X to give the SV release rate waveform. The deconvolved EPSC waveform was



826 then integrated and the maximum slope over a 1 ms time bin was considered the peak rate of SV  
827 release. For the spontaneous release rate after 10 Hz stimulation, the vesicle release rate was the mean  
828 mEPSC frequency over 10 s beginning 100 ms after the last stimulation in the train. For asynchronous  
829 release, the vesicle release rate was calculated by fitting a single exponential to the fast component of  
830 the EPSC decay, subtracting the fast component from the total, and then dividing the charge transfer of  
831 the remaining response by the charge of the average mEPSC for each neuron. For asynchronous release  
832 during 10 Hz stimulation, the vesicle release rate was calculated by baselining the first EPSC in the train,  
833 fitting a single exponential to the fast component of the EPSC decay of the last EPSC in the train,  
834 subtracting the fast component from the total, and then dividing the charge transfer of the remaining  
835 response by the charge of the average mEPSC for each neuron (Chang & Mennerick, 2010; Otsu et al.,  
836 2004). To account for depletion of the pool during the train, A was estimated by multiplying the number  
837 of SVs in the RRP times the ratio of the charge of the last EPSC to the charge of the first EPSC in the train.  
838 Although we note that this may underestimate the amount of depletion due to an increase in release  
839 probability during the train.

840

#### 841 **Experimental design and statistical analysis**

842 KaleidaGraph 4.5 (Synergy Software) and Prism 7 (GraphPad Prism, RRID:SCR\_002798) were  
843 used to create graphs. To test for statistical significance, we used generalized estimating equations (GEE)  
844 in SPSS (24.0 Chicago, III (IBM, RRID:SCR\_002865), which allows for within-subject correlations and the  
845 specification of the most appropriate distribution for the data. All data distributions were assessed with  
846 the Shapiro-Wilk test. Datasets that were significantly different from the normal distribution ( $p < 0.05$ )  
847 were fit with models using the gamma distribution and a log link. Normal datasets were fit with models  
848 using a linear distribution and identity link. We used the model-based estimator for the covariance  
849 matrix and an exchangeable structure for the working correlation matrix. Goodness of fit was

850 determined using the corrected quasi likelihood under independence model criterion and by the visual  
851 assessment of residuals. Because neurons and animals from the same culture are not independent  
852 measurements, culture was used as the subject variable, and animals and neurons were considered  
853 within-subject measurements. All values reported in the text are estimated marginal means +/- standard  
854 error. To determine our sample size for the experiments using paired recording and optogenetic  
855 excitation, we performed a power analysis based on the EPSC amplitude measurements in the single-  
856 neuron cultures and calculated the number of pairs we needed to record from to detect a difference  
857 with 80% power at  $\alpha = 0.05$  in each group if the effect on EPSC amplitude were purely postsynaptic.

858

859

860

861

862

863

864

865

866

867

868

869

870

871

872

873

874 **References**

- 875 Angliker, N., Burri, M., Zaichuk, M., Fritschy, J. M., & Ruegg, M. A. (2015). mTORC1 and mTORC2 have  
876 largely distinct functions in Purkinje cells. *Eur J Neurosci*, *42*(8), 2595-2612.  
877 doi:10.1111/ejn.13051
- 878 Angliker, N., & Ruegg, M. A. (2013). In vivo evidence for mTORC2-mediated actin cytoskeleton  
879 rearrangement in neurons. *Bioarchitecture*, *3*(4), 113-118. doi:10.4161/bioa.26497
- 880 Aumann, Y., & Parnas, H. (1991). Evaluation of the time course of neurotransmitter release from the  
881 measured PSC and MPSC. *Bull Math Biol*, *53*(4), 537-555.
- 882 Barclay, J. W., Craig, T. J., Fisher, R. J., Ciufo, L. F., Evans, G. J., Morgan, A., & Burgoyne, R. D. (2003).  
883 Phosphorylation of Munc18 by protein kinase C regulates the kinetics of exocytosis. *J Biol Chem*,  
884 *278*(12), 10538-10545. doi:10.1074/jbc.M211114200
- 885 Basu, J., Betz, A., Brose, N., & Rosenmund, C. (2007). Munc13-1 C1 domain activation lowers the energy  
886 barrier for synaptic vesicle fusion. *J Neurosci*, *27*(5), 1200-1210. doi:10.1523/JNEUROSCI.4908-  
887 06.2007
- 888 Bateup, H. S., Johnson, C. A., Denefrio, C. L., Saulnier, J. L., Kornacker, K., & Sabatini, B. L. (2013).  
889 Excitatory/inhibitory synaptic imbalance leads to hippocampal hyperexcitability in mouse  
890 models of tuberous sclerosis. *Neuron*, *78*(3), 510-522. doi:10.1016/j.neuron.2013.03.017
- 891 Chamberland, S., & Toth, K. (2016). Functionally heterogeneous synaptic vesicle pools support diverse  
892 synaptic signalling. *J Physiol*, *594*(4), 825-835. doi:10.1113/JP270194
- 893 Chang, C. Y., & Mennerick, S. (2010). Dynamic modulation of phasic and asynchronous glutamate release  
894 in hippocampal synapses. *J Neurophysiol*, *103*(1), 392-401. doi:10.1152/jn.00683.2009
- 895 Chu, Y., Fioravante, D., Leitges, M., & Regehr, W. G. (2014). Calcium-dependent PKC isoforms have  
896 specialized roles in short-term synaptic plasticity. *Neuron*, *82*(4), 859-871.  
897 doi:10.1016/j.neuron.2014.04.003
- 898 Crino, P. B. (2011). mTOR: A pathogenic signaling pathway in developmental brain malformations.  
899 *Trends Mol Med*, *17*(12), 734-742. doi:10.1016/j.molmed.2011.07.008
- 900 Dadalko, O. I., Siuta, M., Poe, A., Erreger, K., Matthies, H. J., Niswender, K., & Galli, A. (2015).  
901 mTORC2/ric1 signaling disrupts dopamine-dependent behaviors via defects in striatal  
902 dopamine neurotransmission. *J Neurosci*, *35*(23), 8843-8854. doi:10.1523/JNEUROSCI.0887-  
903 15.2015
- 904 Diamond, J. S., & Jahr, C. E. (1995). Asynchronous release of synaptic vesicles determines the time  
905 course of the AMPA receptor-mediated EPSC. *Neuron*, *15*(5), 1097-1107.
- 906 Edinger, A. L., & Thompson, C. B. (2002). Akt maintains cell size and survival by increasing mTOR-  
907 dependent nutrient uptake. *Mol Biol Cell*, *13*(7), 2276-2288. doi:10.1091/mbc.01-12-0584
- 908 Fantuzzo, J. A., Mirabella, V. R., Hamod, A. H., Hart, R. P., Zahn, J. D., & Pang, Z. P. (2017). Intellicount:  
909 High-Throughput Quantification of Fluorescent Synaptic Protein Puncta by Machine Learning.  
910 *eNeuro*, *4*(6). doi:10.1523/ENEURO.0219-17.2017
- 911 Fredj, N. B., & Burrone, J. (2009). A resting pool of vesicles is responsible for spontaneous vesicle fusion  
912 at the synapse. *Nat Neurosci*, *12*(6), 751-758. doi:10.1038/nn.2317
- 913 Fujita, Y., Sasaki, T., Fukui, K., Kotani, H., Kimura, T., Hata, Y., . . . Takai, Y. (1996). Phosphorylation of  
914 Munc-18/n-Sec1/rbSec1 by protein kinase C: its implication in regulating the interaction of  
915 Munc-18/n-Sec1/rbSec1 with syntaxin. *J Biol Chem*, *271*(13), 7265-7268.  
916 doi:10.1074/jbc.271.13.7265
- 917 Gazit, N., Vertkin, I., Shapira, I., Helm, M., Slomowitz, E., Sheiba, M., . . . Slutsky, I. (2016). IGF-1 Receptor  
918 Differentially Regulates Spontaneous and Evoked Transmission via Mitochondria at Hippocampal  
919 Synapses. *Neuron*, *89*(3), 583-597. doi:10.1016/j.neuron.2015.12.034

- 920 Graber, T. E., McCamphill, P. K., & Sossin, W. S. (2013). A recollection of mTOR signaling in learning and  
921 memory. *Learn Mem*, *20*(10), 518-530. doi:10.1101/lm.027664.112
- 922 Hay, N., & Sonenberg, N. (2004). Upstream and downstream of mTOR. *Genes Dev*, *18*(16), 1926-1945.  
923 doi:10.1101/gad.1212704
- 924 Henry, F. E., McCartney, A. J., Neely, R., Perez, A. S., Carruthers, C. J., Stuenkel, E. L., . . . Sutton, M. A.  
925 (2012). Retrograde changes in presynaptic function driven by dendritic mTORC1. *J Neurosci*,  
926 *32*(48), 17128-17142. doi:10.1523/JNEUROSCI.2149-12.2012
- 927 Henry, F. E., Wang, X., Serrano, D., Perez, A. S., Carruthers, C. J. L., Stuenkel, E. L., & Sutton, M. A. (2018).  
928 A Unique Homeostatic Signaling Pathway Links Synaptic Inactivity to Postsynaptic mTORC1. *J*  
929 *Neurosci*, *38*(9), 2207-2225. doi:10.1523/JNEUROSCI.1843-17.2017
- 930 Hernandez, D., Torres, C. A., Setlik, W., Cebrian, C., Mosharov, E. V., Tang, G., . . . Sulzer, D. (2012).  
931 Regulation of presynaptic neurotransmission by macroautophagy. *Neuron*, *74*(2), 277-284.  
932 doi:10.1016/j.neuron.2012.02.020
- 933 Hori, T., Takai, Y., & Takahashi, T. (1999). Presynaptic mechanism for phorbol ester-induced synaptic  
934 potentiation. *J Neurosci*, *19*(17), 7262-7267.
- 935 Hou, L., & Klann, E. (2004). Activation of the phosphoinositide 3-kinase-Akt-mammalian target of  
936 rapamycin signaling pathway is required for metabotropic glutamate receptor-dependent long-  
937 term depression. *J Neurosci*, *24*(28), 6352-6361. doi:10.1523/JNEUROSCI.0995-04.2004
- 938 Hsu, P. P., Kang, S. A., Rameseder, J., Zhang, Y., Ottina, K. A., Lim, D., . . . Sabatini, D. M. (2011). The  
939 mTOR-regulated phosphoproteome reveals a mechanism of mTORC1-mediated inhibition of  
940 growth factor signaling. *Science*, *332*(6035), 1317-1322. doi:10.1126/science.1199498
- 941 Huang, W., Zhu, P. J., Zhang, S., Zhou, H., Stoica, L., Galiano, M., . . . Costa-Mattioli, M. (2013). mTORC2  
942 controls actin polymerization required for consolidation of long-term memory. *Nat Neurosci*,  
943 *16*(4), 441-448. doi:10.1038/nn.3351
- 944 Ikenoue, T., Inoki, K., Yang, Q., Zhou, X., & Guan, K. L. (2008). Essential function of TORC2 in PKC and Akt  
945 turn motif phosphorylation, maturation and signalling. *EMBO J*, *27*(14), 1919-1931.  
946 doi:10.1038/emboj.2008.119
- 947 Kaeser, P. S., & Regehr, W. G. (2014). Molecular mechanisms for synchronous, asynchronous, and  
948 spontaneous neurotransmitter release. *Annu Rev Physiol*, *76*, 333-363. doi:10.1146/annurev-  
949 physiol-021113-170338
- 950 Kang, S. A., Pacold, M. E., Cervantes, C. L., Lim, D., Lou, H. J., Ottina, K., . . . Sabatini, D. M. (2013).  
951 mTORC1 phosphorylation sites encode their sensitivity to starvation and rapamycin. *Science*,  
952 *341*(6144), 1236566. doi:10.1126/science.1236566
- 953 Kauwe, G., Tsurudome, K., Penney, J., Mori, M., Gray, L., Calderon, M. R., . . . Haghghi, A. P. (2016).  
954 Acute Fasting Regulates Retrograde Synaptic Enhancement through a 4E-BP-Dependent  
955 Mechanism. *Neuron*, *92*(6), 1204-1212. doi:10.1016/j.neuron.2016.10.063
- 956 Kim, D. H., Sarbassov, D. D., Ali, S. M., King, J. E., Latek, R. R., Erdjument-Bromage, H., . . . Sabatini, D. M.  
957 (2002). mTOR interacts with raptor to form a nutrient-sensitive complex that signals to the cell  
958 growth machinery. *Cell*, *110*(2), 163-175.
- 959 Kim, J., & Guan, K. L. (2019). mTOR as a central hub of nutrient signalling and cell growth. *Nat Cell Biol*,  
960 *21*(1), 63-71. doi:10.1038/s41556-018-0205-1
- 961 Klapoetke, N. C., Murata, Y., Kim, S. S., Pulver, S. R., Birdsey-Benson, A., Cho, Y. K., . . . Boyden, E. S.  
962 (2014). Independent optical excitation of distinct neural populations. *Nat Methods*, *11*(3), 338-  
963 346. doi:10.1038/nmeth.2836
- 964 Lipton, J. O., & Sahin, M. (2014). The neurology of mTOR. *Neuron*, *84*(2), 275-291.  
965 doi:10.1016/j.neuron.2014.09.034
- 966 Mahoney, R. E., Azpurua, J., & Eaton, B. A. (2016). Insulin signaling controls neurotransmission via the  
967 4eBP-dependent modification of the exocytotic machinery. *Elife*, *5*. doi:10.7554/eLife.16807

- 968 Mazei-Robison, M. S., Koo, J. W., Friedman, A. K., Lansink, C. S., Robison, A. J., Vinish, M., . . . Nestler, E.  
969 J. (2011). Role for mTOR signaling and neuronal activity in morphine-induced adaptations in  
970 ventral tegmental area dopamine neurons. *Neuron*, *72*(6), 977-990.  
971 doi:10.1016/j.neuron.2011.10.012
- 972 Meijering, E., Jacob, M., Sarría, J. C., Steiner, P., Hirling, H., & Unser, M. (2004). Design and validation of  
973 a tool for neurite tracing and analysis in fluorescence microscopy images. *Cytometry A*, *58*(2),  
974 167-176. doi:10.1002/cyto.a.20022
- 975 Niere, F., Namjoshi, S., Song, E., Dilly, G. A., Schoenhard, G., Zemelman, B. V., . . . Raab-Graham, K. F.  
976 (2016). Analysis of Proteins That Rapidly Change Upon Mechanistic/Mammalian Target of  
977 Rapamycin Complex 1 (mTORC1) Repression Identifies Parkinson Protein 7 (PARK7) as a Novel  
978 Protein Aberrantly Expressed in Tuberous Sclerosis Complex (TSC). *Mol Cell Proteomics*, *15*(2),  
979 426-444. doi:10.1074/mcp.M115.055079
- 980 Nosyreva, E., & Kavalali, E. T. (2010). Activity-dependent augmentation of spontaneous  
981 neurotransmission during endoplasmic reticulum stress. *J Neurosci*, *30*(21), 7358-7368.  
982 doi:10.1523/JNEUROSCI.5358-09.2010
- 983 O'Reilly, K. E., Rojo, F., She, Q. B., Solit, D., Mills, G. B., Smith, D., . . . Rosen, N. (2006). mTOR inhibition  
984 induces upstream receptor tyrosine kinase signaling and activates Akt. *Cancer Res*, *66*(3), 1500-  
985 1508. doi:10.1158/0008-5472.CAN-05-2925
- 986 Otsu, Y., Shahrezaei, V., Li, B., Raymond, L. A., Delaney, K. R., & Murphy, T. H. (2004). Competition  
987 between phasic and asynchronous release for recovered synaptic vesicles at developing  
988 hippocampal autaptic synapses. *J Neurosci*, *24*(2), 420-433. doi:10.1523/JNEUROSCI.4452-  
989 03.2004
- 990 Penney, J., Tsurudome, K., Liao, E. H., Elazzouzi, F., Livingstone, M., Gonzalez, M., . . . Haghghi, A. P.  
991 (2012). TOR is required for the retrograde regulation of synaptic homeostasis at the *Drosophila*  
992 neuromuscular junction. *Neuron*, *74*(1), 166-178. doi:10.1016/j.neuron.2012.01.030
- 993 Peterson, T. R., Sengupta, S. S., Harris, T. E., Carmack, A. E., Kang, S. A., Balderas, E., . . . Sabatini, D. M.  
994 (2011). mTOR complex 1 regulates lipin 1 localization to control the SREBP pathway. *Cell*, *146*(3),  
995 408-420. doi:10.1016/j.cell.2011.06.034
- 996 Pratt, K. G., Zhu, P., Watari, H., Cook, D. G., & Sullivan, J. M. (2011). A novel role for {gamma}-secretase:  
997 selective regulation of spontaneous neurotransmitter release from hippocampal neurons. *J*  
998 *Neurosci*, *31*(3), 899-906. doi:10.1523/JNEUROSCI.4625-10.2011
- 999 Ramirez, D. M., & Kavalali, E. T. (2011). Differential regulation of spontaneous and evoked  
1000 neurotransmitter release at central synapses. *Curr Opin Neurobiol*, *21*(2), 275-282.  
1001 doi:10.1016/j.conb.2011.01.007
- 1002 Ran, I., Gkogkas, C. G., Vasuta, C., Tartas, M., Khoutorsky, A., Laplante, I., . . . Lacaille, J. C. (2013).  
1003 Selective regulation of GluA subunit synthesis and AMPA receptor-mediated synaptic function  
1004 and plasticity by the translation repressor 4E-BP2 in hippocampal pyramidal cells. *J Neurosci*,  
1005 *33*(5), 1872-1886. doi:10.1523/JNEUROSCI.3264-12.2013
- 1006 Rosenmund, C., & Stevens, C. F. (1996). Definition of the readily releasable pool of vesicles at  
1007 hippocampal synapses. *Neuron*, *16*(6), 1197-1207.
- 1008 Ryan, T. A., Reuter, H., & Smith, S. J. (1997). Optical detection of a quantal presynaptic membrane  
1009 turnover. *Nature*, *388*(6641), 478-482. doi:10.1038/41335
- 1010 Sakaba, T., & Neher, E. (2001). Quantitative relationship between transmitter release and calcium  
1011 current at the calyx of held synapse. *J Neurosci*, *21*(2), 462-476.
- 1012 Sara, Y., Virmani, T., Deak, F., Liu, X., & Kavalali, E. T. (2005). An isolated pool of vesicles recycles at rest  
1013 and drives spontaneous neurotransmission. *Neuron*, *45*(4), 563-573.  
1014 doi:10.1016/j.neuron.2004.12.056

- 1015 Sarbassov, D. D., Ali, S. M., Sengupta, S., Sheen, J. H., Hsu, P. P., Bagley, A. F., . . . Sabatini, D. M. (2006).  
1016 Prolonged rapamycin treatment inhibits mTORC2 assembly and Akt/PKB. *Mol Cell*, *22*(2), 159-  
1017 168. doi:10.1016/j.molcel.2006.03.029
- 1018 Saxton, R. A., & Sabatini, D. M. (2017). mTOR Signaling in Growth, Metabolism, and Disease. *Cell*, *169*(2),  
1019 361-371. doi:10.1016/j.cell.2017.03.035
- 1020 Scarnati, M. S., Kataria, R., Biswas, M., & Paradiso, K. G. (2018). Active presynaptic ribosomes in the  
1021 mammalian brain, and altered transmitter release after protein synthesis inhibition. *Elife*, *7*.  
1022 doi:10.7554/eLife.36697
- 1023 Schindelin, J., Arganda-Carreras, I., Frise, E., Kaynig, V., Longair, M., Pietzsch, T., . . . Cardona, A. (2012).  
1024 Fiji: an open-source platform for biological-image analysis. *Nat Methods*, *9*(7), 676-682.  
1025 doi:10.1038/nmeth.2019
- 1026 Schneggenburger, R., & Neher, E. (2000). Intracellular calcium dependence of transmitter release rates  
1027 at a fast central synapse. *Nature*, *406*(6798), 889-893. doi:10.1038/35022702
- 1028 Schneggenburger, R., & Rosenmund, C. (2015). Molecular mechanisms governing Ca<sup>2+</sup> regulation of  
1029 evoked and spontaneous release. *Nat Neurosci*, *18*(7), 935-941. doi:10.1038/nn.4044
- 1030 Smillie, K. J., & Cousin, M. A. (2012). Akt/PKB controls the activity-dependent bulk endocytosis of  
1031 synaptic vesicles. *Traffic*, *13*(7), 1004-1011. doi:10.1111/j.1600-0854.2012.01365.x
- 1032 Sperow, M., Berry, R. B., Bayazitov, I. T., Zhu, G., Baker, S. J., & Zakharenko, S. S. (2012). Phosphatase  
1033 and tensin homologue (PTEN) regulates synaptic plasticity independently of its effect on  
1034 neuronal morphology and migration. *J Physiol*, *590*(4), 777-792.  
1035 doi:10.1113/jphysiol.2011.220236
- 1036 Stoica, L., Zhu, P. J., Huang, W., Zhou, H., Kozma, S. C., & Costa-Mattioli, M. (2011). Selective  
1037 pharmacogenetic inhibition of mammalian target of Rapamycin complex I (mTORC1) blocks  
1038 long-term synaptic plasticity and memory storage. *Proc Natl Acad Sci U S A*, *108*(9), 3791-3796.  
1039 doi:10.1073/pnas.1014715108
- 1040 Sudhof, T. C. (2012). Calcium control of neurotransmitter release. *Cold Spring Harb Perspect Biol*, *4*(1),  
1041 a011353. doi:10.1101/cshperspect.a011353
- 1042 Takeuchi, K., Gertner, M. J., Zhou, J., Parada, L. F., Bennett, M. V., & Zukin, R. S. (2013). Dysregulation of  
1043 synaptic plasticity precedes appearance of morphological defects in a Pten conditional knockout  
1044 mouse model of autism. *Proc Natl Acad Sci U S A*, *110*(12), 4738-4743.  
1045 doi:10.1073/pnas.1222803110
- 1046 Tang, G., Gudsnuk, K., Kuo, S. H., Cotrina, M. L., Rosoklija, G., Sosunov, A., . . . Sulzer, D. (2014). Loss of  
1047 mTOR-dependent macroautophagy causes autistic-like synaptic pruning deficits. *Neuron*, *83*(5),  
1048 1131-1143. doi:10.1016/j.neuron.2014.07.040
- 1049 Tang, S. J., Reis, G., Kang, H., Gingras, A. C., Sonenberg, N., & Schuman, E. M. (2002). A rapamycin-  
1050 sensitive signaling pathway contributes to long-term synaptic plasticity in the hippocampus.  
1051 *Proc Natl Acad Sci U S A*, *99*(1), 467-472. doi:10.1073/pnas.012605299
- 1052 Thomanetz, V., Angliker, N., Cloetta, D., Lustenberger, R. M., Schweighauser, M., Oliveri, F., . . . Ruegg,  
1053 M. A. (2013). Ablation of the mTORC2 component rictor in brain or Purkinje cells affects size and  
1054 neuron morphology. *J Cell Biol*, *201*(2), 293-308. doi:10.1083/jcb.201205030
- 1055 Urbanska, M., Gozdz, A., Swiech, L. J., & Jaworski, J. (2012). Mammalian target of rapamycin complex 1  
1056 (mTORC1) and 2 (mTORC2) control the dendritic arbor morphology of hippocampal neurons. *J  
1057 Biol Chem*, *287*(36), 30240-30256. doi:10.1074/jbc.M112.374405
- 1058 Wang, Y., Barbaro, M. F., & Baraban, S. C. (2006). A role for the mTOR pathway in surface expression of  
1059 AMPA receptors. *Neurosci Lett*, *401*(1-2), 35-39. doi:10.1016/j.neulet.2006.03.011
- 1060 Wasser, C. R., Ertunc, M., Liu, X., & Kavalali, E. T. (2007). Cholesterol-dependent balance between  
1061 evoked and spontaneous synaptic vesicle recycling. *J Physiol*, *579*(Pt 2), 413-429.  
1062 doi:10.1113/jphysiol.2006.123133



- 1063 Weston, M. C., Chen, H., & Swann, J. W. (2012). Multiple roles for mammalian target of rapamycin  
1064 signaling in both glutamatergic and GABAergic synaptic transmission. *J Neurosci*, *32*(33), 11441-  
1065 11452. doi:10.1523/JNEUROSCI.1283-12.2012
- 1066 Weston, M. C., Chen, H., & Swann, J. W. (2014). Loss of mTOR repressors Tsc1 or Pten has divergent  
1067 effects on excitatory and inhibitory synaptic transmission in single hippocampal neuron cultures.  
1068 *Front Mol Neurosci*, *7*, 1. doi:10.3389/fnmol.2014.00001
- 1069 Williams, M. R., DeSpenza, T., Jr., Li, M., Gullledge, A. T., & Luikart, B. W. (2015). Hyperactivity of  
1070 newborn Pten knock-out neurons results from increased excitatory synaptic drive. *J Neurosci*,  
1071 *35*(3), 943-959. doi:10.1523/JNEUROSCI.3144-14.2015
- 1072 Wullschleger, S., Loewith, R., & Hall, M. N. (2006). TOR signaling in growth and metabolism. *Cell*, *124*(3),  
1073 471-484. doi:10.1016/j.cell.2006.01.016
- 1074 Xie, J., & Proud, C. G. (2014). Signaling crosstalk between the mTOR complexes. *Translation (Austin)*,  
1075 *2*(1), e28174. doi:10.4161/trla.28174
- 1076 Xiong, Q., Oviedo, H. V., Trotman, L. C., & Zador, A. M. (2012). PTEN regulation of local and long-range  
1077 connections in mouse auditory cortex. *J Neurosci*, *32*(5), 1643-1652.  
1078 doi:10.1523/JNEUROSCI.4480-11.2012
- 1079 Xu, C., Liu, Q. Y., & Alkon, D. L. (2014). PKC activators enhance GABAergic neurotransmission and paired-  
1080 pulse facilitation in hippocampal CA1 pyramidal neurons. *Neuroscience*, *268*, 75-86.  
1081 doi:10.1016/j.neuroscience.2014.03.008
- 1082 Zamir, O., & Charlton, M. P. (2006). Cholesterol and synaptic transmitter release at crayfish  
1083 neuromuscular junctions. *J Physiol*, *571*(Pt 1), 83-99. doi:10.1113/jphysiol.2005.098319
- 1084 Zhu, P. J., Chen, C. J., Mays, J., Stoica, L., & Costa-Mattioli, M. (2018). mTORC2, but not mTORC1, is  
1085 required for hippocampal mGluR-LTD and associated behaviors. *Nat Neurosci*, *21*(6), 799-802.  
1086 doi:10.1038/s41593-018-0156-7
- 1087 Zoghbi, H. Y., & Bear, M. F. (2012). Synaptic dysfunction in neurodevelopmental disorders associated  
1088 with autism and intellectual disabilities. *Cold Spring Harb Perspect Biol*, *4*(3).  
1089 doi:10.1101/cshperspect.a009886
- 1090
